# Supplementary material for: Gut microbiota from high-risk men who have sex with men drive immune activation in gnotobiotic mice and in vitro HIV infection
Source: PLoS Pathog. 2019 Apr 4;15(4):e1007611. doi: 10.1371/journal.ppat.1007611 (PMC6448819; doi:10.1371/journal.ppat.1007611)
Supplement: S3 Table — Four comparisons are shown, each one in an individual tab: (1) HIV-neg MSW vs HIV-neg MSM in recipients, (2) HIV-neg MSM vs HIV-pos MSM in recipients, (3) HIV-neg MSW vs HIV-neg MSM in donors, and (4) HIV-neg MSM vs HIV-pos MSM in donors. Non-parametric t-tests were performed for all sequence variants. FDR_P = FDR corrected p-values, Bonferroni_P = Bonferroni corrected p-values. Differences with FDR_P<0.1 are highlighted. (XLSX) [file ppat.1007611.s012.xlsx]

## Sheet: (1) mice-HIV-MSW_vs_HIV-MSM
Relative abundance of 16S sequence variants were compared between recipients of HIV-negative MSW and HIV-negative MSM by nonparametric t-test
Sequence Variant ID	Test-Statistic	P	FDR_P	Bonferroni_P	HIV- MSM mean	HIV- MSW mean	Taxonomy
72d6ddeb60679dd2e2844fe039e1a760	3.39628	0.000999001	0.044955	0.17982	0.00649124	0	k__Bacteria; p__Proteobacteria; c__Deltaproteobacteria; o__Desulfovibrionales; f__Desulfovibrionaceae; g__; s__
3e93fd55a231bb99b67a666bad8446a8	-4.4404	0.000999001	0.044955	0.17982	0.000145151	0.000954298	k__Bacteria; p__Firmicutes; c__Clostridia; o__Clostridiales; f__Ruminococcaceae; g__Ruminococcus; s__
ea2b0e4a93c24c6c3661cbe347f93b74	-4.13812	0.000999001	0.044955	0.17982	0.0568042	0.138786	k__Bacteria; p__Bacteroidetes; c__Bacteroidia; o__Bacteroidales; f__Bacteroidaceae; g__Bacteroides; s__uniformis
919db619ad90cc6b09b31c83d5719da9	-3.60189	0.000999001	0.044955	0.17982	0.000254405	0.00204907	k__Bacteria; p__Firmicutes; c__Clostridia; o__Clostridiales; f__Ruminococcaceae; g__Oscillospira; s__
0f6200a5b77099113b52eea9a8645181	3.38046	0.001998	0.0719281	0.35964	0.00127359	4.45934e-05	k__Bacteria; p__Firmicutes; c__Erysipelotrichi; o__Erysipelotrichales; f__Erysipelotrichaceae; g__[Eubacterium]; s__biforme
4faf0d1e462b85e630eaa40b17d8d744	2.62768	0.002997	0.0899101	0.539461	0.000160759	0	k__Bacteria; p__Firmicutes; c__Clostridia; o__Clostridiales; f__; g__; s__
1e6fb78e2244ca940f9fc31d88d711dc	2.63202	0.003996	0.102754	0.719281	0.000187292	0	k__Bacteria; p__Firmicutes; c__Clostridia; o__Clostridiales; f__[Mogibacteriaceae]; g__Mogibacterium; s__
cc968157f7691aab95df444e8cd103e2	-2.51244	0.00599401	0.134865	1	8.7403e-05	0.000383503	k__Bacteria; p__Firmicutes; c__Clostridia; o__Clostridiales; f__Clostridiaceae; g__Clostridium; s__
7c82a2ef7685c5c6dc3080f56033cee9	2.78127	0.00699301	0.13986	1	0.000132665	0	k__Bacteria; p__Proteobacteria; c__Betaproteobacteria; o__Burkholderiales; f__Oxalobacteraceae; g__Oxalobacter; s__formigenes
1aab913302590e21a7be28b1494a3320	-2.68866	0.00899101	0.155844	1	6.087e-05	0.000182833	k__Bacteria; p__Firmicutes; c__Clostridia; o__Clostridiales; f__Ruminococcaceae; g__Oscillospira; s__
b153e0852342c0738da791930625716f	2.48527	0.010989	0.155844	1	0.000363659	0	k__Bacteria; p__Firmicutes; c__Erysipelotrichi; o__Erysipelotrichales; f__Erysipelotrichaceae; g__[Eubacterium]; s__biforme
30207d209491dfb7de83344e77fd6fbd	2.61541	0.011988	0.155844	1	0.00163412	0.000218508	k__Bacteria; p__Firmicutes; c__Clostridia; o__Clostridiales; f__; g__; s__
0681937d15d01090c93f3fb99998d90c	2.60128	0.012987	0.155844	1	0.000767898	0	k__Bacteria; p__Proteobacteria; c__Deltaproteobacteria; o__Desulfovibrionales; f__Desulfovibrionaceae; g__Desulfovibrio; s__
436497b0e3edb384200f5b9b82883182	2.27058	0.012987	0.155844	1	0.00125486	0.000209589	k__Bacteria; p__Firmicutes; c__Clostridia; o__Clostridiales; f__Ruminococcaceae; g__; s__
fdb1c35a8dab336d65ed22d796e71e4b	2.44118	0.012987	0.155844	1	7.64777e-05	0	k__Bacteria; p__Actinobacteria; c__Coriobacteriia; o__Coriobacteriales; f__Coriobacteriaceae; g__; s__
fea3411c847e6627afb5e78b88e2e9af	-2.41841	0.015984	0.17982	1	0.000273134	0.00129321	k__Bacteria; p__Firmicutes; c__Clostridia; o__Clostridiales; f__Lachnospiraceae; g__[Ruminococcus]; s__torques
96b08b31f324f113c7b260a50f09860c	2.28806	0.016983	0.17982	1	0.00335721	0	k__Bacteria; p__Bacteroidetes; c__Bacteroidia; o__Bacteroidales; f__[Odoribacteraceae]; g__Butyricimonas; s__
c162a4f3943238810eba8a25f0563cca	2.41058	0.018981	0.18981	1	0.204893	0.106712	k__Bacteria; p__Bacteroidetes; c__Bacteroidia; o__Bacteroidales; f__Bacteroidaceae; g__Bacteroides
993ea35e8ad7ff6894e32247dc507e9b	-1.37066	0.022977	0.214072	1	5.77484e-05	0.00157415	k__Bacteria; p__Firmicutes; c__Clostridia; o__Clostridiales; f__Lachnospiraceae; g__Blautia; s__producta
57e77761c7d4464a3968f059b4a9afcc	2.16001	0.023976	0.214072	1	0.000977041	0.000147158	k__Bacteria; p__Firmicutes; c__Clostridia; o__Clostridiales; f__Ruminococcaceae; g__; s__
32a21601ca89d1f2629c1a9fc2de4359	2.47982	0.024975	0.214072	1	0.00398776	0.000755858	k__Bacteria; p__Bacteroidetes; c__Bacteroidia; o__Bacteroidales; f__[Paraprevotellaceae]; g__Paraprevotella; s__
904ad13c7b8512200836d5cd9fb09e1b	-2.19493	0.031968	0.261557	1	9.67676e-05	0.000312154	k__Bacteria; p__Bacteroidetes; c__Bacteroidia; o__Bacteroidales; f__Rikenellaceae; g__Alistipes; s__indistinctus
3233034b11dfc584717d9264882a4fce	-1.99785	0.041958	0.328367	1	0.000451062	0.001097	k__Bacteria; p__Firmicutes; c__Clostridia; o__Clostridiales; f__Ruminococcaceae
138daeaeee1211d2a3d8502b8fe23b2a	1.98019	0.046953	0.345255	1	0.00022319	0	k__Bacteria; p__Bacteroidetes; c__Bacteroidia; o__Bacteroidales; f__S24-7; g__; s__
60c57911662a9159dfdd0fc05d975a55	1.8479	0.047952	0.345255	1	0.000688299	3.56747e-05	k__Bacteria; p__Firmicutes; c__Clostridia; o__Clostridiales; f__Ruminococcaceae; g__Gemmiger; s__formicilis
79280cea51a6fe8a3432b2f266dd34db	-1.80954	0.0569431	0.394221	1	0.00232242	0.00722859	k__Bacteria; p__Firmicutes; c__Clostridia; o__Clostridiales; f__Ruminococcaceae; g__Faecalibacterium; s__prausnitzii
2403a466dd6d1e4f551d80394c2aa994	1.96818	0.0639361	0.42624	1	0.0121475	0.00313046	k__Bacteria; p__Bacteroidetes; c__Bacteroidia; o__Bacteroidales; f__[Paraprevotellaceae]; g__Paraprevotella; s__
92f000f936d3f349c5e7719a5edc5078	1.83716	0.0689311	0.435049	1	0.000326201	2.0067e-05	k__Bacteria; p__Firmicutes; c__Clostridia; o__Clostridiales; f__Lachnospiraceae; g__; s__
217185aee687740c4fa3cc0aa17ee4ff	1.65101	0.0729271	0.435049	1	0.000404239	0	k__Bacteria; p__Firmicutes; c__Erysipelotrichi; o__Erysipelotrichales; f__Erysipelotrichaceae; g__Catenibacterium; s__
ca9dec36ad0aa5a1473144ddcb74951d	2.05958	0.0739261	0.435049	1	0.00436703	0	k__Bacteria; p__Firmicutes; c__Clostridia; o__Clostridiales; f__Ruminococcaceae
d05c86b5bfc092d8677507fb1eae8d66	1.4264	0.0749251	0.435049	1	0.000549391	3.3445e-05	k__Bacteria; p__Firmicutes; c__Clostridia; o__Clostridiales; f__Ruminococcaceae; g__Ruminococcus; s__
f738d6eb5441459c12e96023d56dafcf	-1.75326	0.0819181	0.457724	1	0.000149834	0.000341139	k__Bacteria; p__Firmicutes; c__Clostridia; o__Clostridiales; f__Lachnospiraceae; g__Coprococcus; s__
ad7bc2bb6e1ec90a9bc3c8949bce80d6	-1.41111	0.0839161	0.457724	1	0.000110815	0.00396435	k__Bacteria; p__Firmicutes; c__Clostridia; o__Clostridiales; f__Lachnospiraceae; g__[Ruminococcus]; s__gnavus
340a5698fe78713b785c3bcce89df73b	1.70547	0.0899101	0.475995	1	0.00014203	4.0134e-05	k__Bacteria; p__Bacteroidetes; c__Bacteroidia; o__Bacteroidales; f__Rikenellaceae; g__; s__
9f74473636e6874853d88dfcbcecff49	-1.72391	0.0959041	0.486	1	2.18508e-05	5.57417e-05	k__Bacteria; p__Firmicutes; c__Bacilli; o__Lactobacillales; f__Streptococcaceae; g__Lactococcus; s__
48d9883fd871b82d9bbc89cb0447be8c	-1.69748	0.0979021	0.486	1	0.0018776	0.00486291	k__Bacteria; p__Firmicutes; c__Clostridia; o__Clostridiales; f__Lachnospiraceae; g__Clostridium; s__aldenense
46d8ab5615f60d7b522f3590976668be	-1.69307	0.0999001	0.486	1	2.18508e-05	7.58088e-05	k__Bacteria; p__Firmicutes; c__Clostridia; o__Clostridiales; f__; g__; s__
113ce005a880987438bdbe19ee22add8	-1.31312	0.121878	0.569431	1	0.000906807	0.0039376	k__Bacteria; p__Firmicutes; c__Bacilli; o__Turicibacterales; f__Turicibacteraceae; g__Turicibacter; s__
6a17479edbe461431433bddb084f731e	-1.53665	0.134865	0.569431	1	0.00710306	0.0145308	k__Bacteria; p__Proteobacteria; c__Betaproteobacteria; o__Burkholderiales; f__Alcaligenaceae; g__Sutterella; s__
b955f67a541a149dd3b179dc62d37a72	1.52711	0.138861	0.569431	1	0.000229433	6.68901e-05	k__Bacteria; p__Firmicutes; c__Clostridia; o__Clostridiales; f__[Mogibacteriaceae]; g__; s__
32382a0f5831da5faee464d011b5616c	1.62771	0.138861	0.569431	1	0.000397996	6.68901e-06	k__Bacteria; p__Firmicutes; c__Clostridia; o__Clostridiales; f__Lachnospiraceae; g__Lachnobacterium; s__
1ad289cd8f44e109fd95de0382c5b252	-1.51718	0.140859	0.569431	1	0.00277349	0.00739581	k__Bacteria; p__Firmicutes; c__Clostridia; o__Clostridiales; f__Lachnospiraceae; g__Clostridium; s__hathewayi
74923f4bbde849e27fc4eda25d757e2a	-1.46075	0.140859	0.569431	1	0.000727318	0.00129098	k__Bacteria; p__Firmicutes; c__Erysipelotrichi; o__Erysipelotrichales; f__Erysipelotrichaceae; g__[Eubacterium]; s__dolichum
4be97abf1ab678a8322783fab899c3a4	1.49313	0.141858	0.569431	1	8.89638e-05	4.0134e-05	k__Bacteria; p__Firmicutes; c__Clostridia; o__Clostridiales; f__Ruminococcaceae; g__Anaerofilum; s__
2319f9fecaef59a51537cdcb69cf5615	1.42041	0.155844	0.569431	1	0.000443258	0.000167225	k__Bacteria; p__Firmicutes; c__Clostridia; o__Clostridiales; f__Ruminococcaceae
149e7d5e484d157f2ac6140a2111618e	-1.2257	0.156843	0.569431	1	0.00014203	0.00228764	k__Bacteria; p__Firmicutes; c__Clostridia; o__Clostridiales; f__Ruminococcaceae; g__Faecalibacterium; s__prausnitzii
992072d045462445dc239b35300af2cc	-1.74097	0.162837	0.569431	1	0	0.00751844	k__Bacteria; p__Bacteroidetes; c__Bacteroidia; o__Bacteroidales; f__Prevotellaceae; g__Prevotella; s__copri
ba88d4e4e6a24ecc2a5aab6bdfbb77f5	1.42017	0.164835	0.569431	1	0.00018261	0	k__Bacteria; p__Firmicutes; c__Clostridia; o__Clostridiales; f__Ruminococcaceae; g__Oscillospira; s__
3f55a8ca784ae7190790023a30cd859c	1.31034	0.165834	0.569431	1	0.0237877	0.000193981	k__Bacteria; p__Bacteroidetes; c__Bacteroidia; o__Bacteroidales; f__Porphyromonadaceae; g__Parabacteroides; s__gordonii
d315a0b30c8e21db4cfe89e65c0b2bf1	-1.38868	0.165834	0.569431	1	6.86738e-05	0.000196211	k__Bacteria; p__Firmicutes; c__Clostridia; o__Clostridiales; f__; g__; s__
f12011ad5219b22b6ca790103333a755	1.46924	0.167832	0.569431	1	0.00064928	0.000312154	k__Bacteria; p__Firmicutes; c__Clostridia; o__Clostridiales; f__Ruminococcaceae; g__Oscillospira; s__
f10155af1849a17996f302d71b32398c	1.4124	0.168831	0.569431	1	4.21408e-05	4.45934e-06	k__Bacteria; p__Firmicutes; c__Clostridia; o__Clostridiales; f__Lachnospiraceae
74ec9fe6ffab4ecff6d5def74298a825	1.43073	0.16983	0.569431	1	0.00954878	0.00536458	k__Bacteria; p__Firmicutes; c__Clostridia; o__Clostridiales; f__Lachnospiraceae; g__Clostridium
bd0f4e14387ee1ac7e5fe586cadbbed4	-1.5517	0.170829	0.569431	1	3.27761e-05	6.68901e-05	k__Bacteria; p__Firmicutes; c__Clostridia; o__Clostridiales; f__Christensenellaceae; g__; s__
c1365ec008032ee718dcafaf5ac17adb	-1.32196	0.175824	0.575425	1	4.83838e-05	0.000107024	k__Bacteria; p__Bacteroidetes; c__Bacteroidia; o__Bacteroidales; f__Rikenellaceae; g__; s__
7ebc04cb539befd9f2e7faa131628c66	1.69919	0.183816	0.590838	1	2.029e-05	0	k__Bacteria; p__Firmicutes; c__Clostridia; o__Clostridiales; f__[Mogibacteriaceae]; g__; s__
ee02d6d3506da57909d5e603709a295f	-1.44443	0.192807	0.598367	1	0.000237237	0.00107024	k__Bacteria; p__Firmicutes; c__Clostridia; o__Clostridiales; f__Lachnospiraceae; g__; s__
59597cd430deea6d8e0908dcd6db7e50	1.37237	0.192807	0.598367	1	0.00672535	0.00256858	k__Bacteria; p__Proteobacteria; c__Betaproteobacteria; o__Burkholderiales; f__Alcaligenaceae; g__Sutterella; s__
86deb5cf8d6f29d383136e0d09863b69	-1.34366	0.202797	0.606251	1	0.00155609	0.00253736	k__Bacteria; p__Firmicutes; c__Erysipelotrichi; o__Erysipelotrichales; f__Erysipelotrichaceae; g__Holdemania; s__
8937656c16c20701c107e715bad86732	1.31946	0.205794	0.606251	1	0.00101762	7.80384e-05	k__Bacteria; p__Firmicutes; c__Clostridia; o__Clostridiales; f__Lachnospiraceae; g__Roseburia; s__faecis
40c85a458df8d5a935122ba778d4f334	-1.19239	0.217782	0.606251	1	0.016591	0.0338731	k__Bacteria; p__Bacteroidetes; c__Bacteroidia; o__Bacteroidales; f__Bacteroidaceae; g__Bacteroides; s__
bda6b6e7da7508c68057140e7bd6cd8d	1.33837	0.220779	0.606251	1	0.00116277	0	k__Bacteria; p__Firmicutes; c__Clostridia; o__Clostridiales; f__Ruminococcaceae; g__Oscillospira; s__
61795ee8e60f4a0f66080ab812573fb8	-1.22938	0.222777	0.606251	1	0.00319958	0.00575924	k__Bacteria; p__Firmicutes; c__Clostridia; o__Clostridiales; f__Lachnospiraceae
a3607a88a8ed64e24a374847b23e404f	1.2541	0.224775	0.606251	1	0.00046667	0.000111483	k__Bacteria; p__Firmicutes; c__Clostridia; o__Clostridiales; f__Ruminococcaceae; g__Ruminococcus; s__
e6a34eb113dba66df0b8bbec907a8f5d	-1.21874	0.226773	0.606251	1	0.00317148	0.00616281	k__Bacteria; p__Bacteroidetes; c__Bacteroidia; o__Bacteroidales; f__Rikenellaceae; g__Alistipes; s__putredinis
a24dae6b87885a55d81df1ea6d1abaf5	1.31623	0.228771	0.606251	1	0.000429211	7.58088e-05	k__Bacteria; p__Firmicutes; c__Clostridia; o__Clostridiales; f__Lachnospiraceae; g__; s__
39bb3fb5b2257fd2eacca408dc42c5d1	-1.22214	0.22977	0.606251	1	7.49169e-05	0.000178374	k__Bacteria; p__Firmicutes; c__Clostridia; o__Clostridiales; f__Lachnospiraceae; g__; s__
e82ab12c51a893c6d7938a16632199a8	1.31639	0.230769	0.606251	1	0.00518799	0.000396881	k__Bacteria; p__Firmicutes; c__Clostridia; o__Clostridiales; f__Lachnospiraceae
457d3865cf0a4bc602a07d8d5324388f	-1.19766	0.235764	0.606251	1	0.0021445	0.0036522	k__Bacteria; p__Firmicutes; c__Clostridia; o__Clostridiales; f__Lachnospiraceae; g__; s__
f45b62ab6ec22fb20364a7e05088158f	-1.17844	0.235764	0.606251	1	0.000148273	0.000610929	k__Bacteria; p__Firmicutes; c__Clostridia; o__Clostridiales; f__Lachnospiraceae
34cddd9fe152c24d78924ef25927d67c	1.27009	0.241758	0.612908	1	0.00609792	0.00217839	k__Bacteria; p__Firmicutes; c__Clostridia; o__Clostridiales; f__Lachnospiraceae; g__Clostridium; s__hathewayi
f9f5f08e8da4cc9740518223846563db	1.31949	0.246753	0.616883	1	0.000149834	3.56747e-05	k__Bacteria; p__Bacteroidetes; c__Bacteroidia; o__Bacteroidales; f__Rikenellaceae; g__; s__
a678fc12f8ade13c2f9c76d3d5c1cea0	1.12456	0.250749	0.618286	1	0.00124081	0.000387962	k__Bacteria; p__Firmicutes; c__Clostridia; o__Clostridiales; f__Veillonellaceae; g__Phascolarctobacterium; s__
6c7fa77831ae630967a6fbfc8ee47901	-1.30657	0.255744	0.622081	1	0.000265331	0.00100781	k__Bacteria; p__Firmicutes; c__Clostridia; o__Clostridiales; f__Lachnospiraceae; g__Clostridium; s__clostridioforme
ac5402de1ddf427ab8d2b0a8a0a44f19	-1.08324	0.260739	0.625774	1	0.0254702	0.034678	k__Bacteria; p__Bacteroidetes; c__Bacteroidia; o__Bacteroidales; f__Bacteroidaceae; g__Bacteroides; s__
539ca948741b9a713eb781d4281b23fc	1.08973	0.297702	0.705084	1	0.00089276	0.000510594	k__Bacteria; p__Firmicutes; c__Clostridia; o__Clostridiales; f__Ruminococcaceae; g__Anaerotruncus; s__
363c1c39d58bce4fc3218659d0944258	1.08632	0.305694	0.71461	1	0.000761655	0.000303235	k__Bacteria; p__Firmicutes; c__Clostridia; o__Clostridiales; f__Lachnospiraceae
8a83cfd5eb074b5dbc6118eb03ef915e	1.12709	0.314685	0.714785	1	0.00452467	0.00177036	k__Bacteria; p__Bacteroidetes; c__Bacteroidia; o__Bacteroidales; f__[Odoribacteraceae]; g__Butyricimonas; s__
7e17a5137fd9dab8c02617a186088c4d	-1.0212	0.314685	0.714785	1	0.000148273	0.000240804	k__Bacteria; p__Firmicutes; c__Clostridia; o__Clostridiales; f__Ruminococcaceae; g__; s__
2b982979f2401a8bc447d7141879e9b2	1.04232	0.317682	0.714785	1	0.000327761	0.000176144	k__Bacteria; p__Firmicutes; c__Clostridia; o__Clostridiales; f__Lachnospiraceae
0b05a2e48cdc5f9e766bb0f4c209d4b4	-0.991081	0.333666	0.731826	1	0.000176367	0.000234115	k__Bacteria; p__Firmicutes; c__Clostridia; o__Clostridiales; f__Ruminococcaceae; g__Oscillospira; s__
a167e4d4418792dcaba877443ed0e66d	0.946635	0.334665	0.731826	1	0.000424529	0.000247493	k__Bacteria; p__Bacteroidetes; c__Bacteroidia; o__Bacteroidales; f__[Odoribacteraceae]; g__Butyricimonas; s__
599ba6458e91e2527f358f547ea39261	1.0503	0.33966	0.731826	1	0.00178396	0.000853963	k__Bacteria; p__Firmicutes; c__Clostridia; o__Clostridiales; f__Lachnospiraceae; g__Blautia; s__
69536042153447ceb692aa53159ce0c2	-1.20049	0.342657	0.731826	1	0	1.11483e-05	k__Bacteria; p__Firmicutes; c__Clostridia; o__Clostridiales; f__Lachnospiraceae
40a6b537d995aeb12b0100e2cb6ad879	1.18241	0.347652	0.731826	1	3.58977e-05	4.45934e-06	k__Bacteria; p__Firmicutes; c__Clostridia; o__Clostridiales; f__Lachnospiraceae; g__Blautia; s__
6c4de756c45fa6e7e5adfe196f9f0039	-1.27729	0.34965	0.731826	1	1.40469e-05	7.80384e-05	k__Bacteria; p__Firmicutes; c__Clostridia; o__Clostridiales; f__Lachnospiraceae; g__Coprococcus; s__
010f0ac2691bc0be12d0633d4b5d2cc4	1.07913	0.363636	0.741259	1	0.00302633	0.00117058	k__Bacteria; p__Firmicutes; c__Clostridia; o__Clostridiales; f__Ruminococcaceae; g__Faecalibacterium; s__prausnitzii
8f1c11c7b732265cbfc1bb7dbd0241e7	-1.04506	0.363636	0.741259	1	1.24861e-05	2.89857e-05	k__Bacteria; p__Firmicutes; c__Clostridia; o__Clostridiales; f__Lachnospiraceae; g__; s__
04195686f2b70585790ec75320de0d6f	-1.13867	0.36963	0.741259	1	0.00067113	0.0131528	k__Bacteria; p__Proteobacteria; c__Gammaproteobacteria; o__Enterobacteriales; f__Enterobacteriaceae
eea6b86c0c75e740670ccc50613b1b23	0.915119	0.370629	0.741259	1	0.00277192	0.00197549	k__Bacteria; p__Firmicutes; c__Clostridia; o__Clostridiales; f__Lachnospiraceae; g__Blautia; s__
95c5af385d373db8539f91a1a3b334a8	0.883274	0.385614	0.753352	1	7.49169e-05	4.23637e-05	k__Bacteria; p__Firmicutes; c__Clostridia; o__Clostridiales; f__Ruminococcaceae; g__; s__
1527fd8b14037f53b8edb26b111e1f72	-1.20049	0.393606	0.753352	1	0	1.3378e-05	k__Bacteria; p__Firmicutes; c__Clostridia; o__Clostridiales; f__Lachnospiraceae; g__; s__
4c731267e801c2afe253b5cbb58bdd24	1.06298	0.394605	0.753352	1	4.83838e-05	1.11483e-05	k__Bacteria; p__Firmicutes; c__Clostridia; o__Clostridiales; f__Lachnospiraceae; g__Dorea; s__
2c1dcc76478dfbb19fa59690738202c6	-0.901055	0.394605	0.753352	1	0.000160759	0.000280938	k__Bacteria; p__Firmicutes; c__Clostridia; o__Clostridiales; f__Lachnospiraceae; g__[Ruminococcus]; s__gnavus
1a389bf765c8ff0f92600f684fbe7ad7	-1.0083	0.397602	0.753352	1	0.00014203	0.000590862	k__Bacteria; p__Firmicutes; c__Clostridia; o__Clostridiales; f__Ruminococcaceae; g__Faecalibacterium; s__prausnitzii
fd1f139259c53276619476db0cc81913	-0.893857	0.402597	0.75487	1	0.0016154	0.00276702	k__Bacteria; p__Firmicutes; c__Clostridia; o__Clostridiales; f__Lachnospiraceae; g__Blautia; s__
8ce931b0c99ad5ed648c25483c1ca492	0.912285	0.416583	0.765965	1	0.00189477	0.00120625	k__Bacteria; p__Firmicutes; c__Erysipelotrichi; o__Erysipelotrichales; f__Erysipelotrichaceae; g__Clostridium; s__ramosum
90c2b51afe404951ec89bd52c7ae1f58	-0.820057	0.423576	0.765965	1	0.000273134	0.000376814	k__Bacteria; p__Firmicutes; c__Clostridia; o__Clostridiales; f__Lachnospiraceae; g__Dorea; s__
89aabf43d24dd5bd0fd0f5aca189d341	-1.05088	0.427572	0.765965	1	1.09254e-05	5.12824e-05	k__Bacteria; p__Firmicutes; c__Clostridia; o__Clostridiales; f__Lachnospiraceae; g__Dorea; s__formicigenerans
b0645cbec7653c887cb868a248d95874	1.00594	0.433566	0.765965	1	0.00155296	9.81054e-05	k__Bacteria; p__Firmicutes; c__Clostridia; o__Clostridiales; f__Ruminococcaceae; g__Faecalibacterium; s__prausnitzii
4311a44a7d56ce4086afad3e75bedd6e	0.778553	0.434565	0.765965	1	0.00844376	0.00622078	k__Bacteria; p__Firmicutes; c__Clostridia; o__Clostridiales; f__Ruminococcaceae
0189d0173c07f11e7586ff20eb33f5ba	-0.844792	0.436563	0.765965	1	0.00136879	0.00216501	k__Bacteria; p__Firmicutes; c__Erysipelotrichi; o__Erysipelotrichales; f__Erysipelotrichaceae; g__; s__
370829fece3190f1a8efccf50b7d0921	0.762722	0.442557	0.765965	1	0.00751978	0.00633895	k__Bacteria; p__Firmicutes; c__Clostridia; o__Clostridiales; f__Ruminococcaceae; g__Oscillospira; s__
10cd502b01abafc87e2ecbad86389286	0.874083	0.442557	0.765965	1	0.000163881	5.79714e-05	k__Bacteria; p__Firmicutes; c__Clostridia; o__Clostridiales; f__Lachnospiraceae; g__; s__
bfb7bb16ab570748b3a5d099e9426af1	-0.848663	0.451548	0.774083	1	0.000338687	0.000586403	k__Bacteria; p__Firmicutes; c__Clostridia; o__Clostridiales; f__Ruminococcaceae; g__; s__
41239266f2952a56a313fc4798f28a1c	0.93946	0.462537	0.778671	1	0.000998892	0.00033668	k__Bacteria; p__Firmicutes; c__Clostridia; o__Clostridiales; f__; g__; s__
f596fa835cdfdb22d6494b012f61fff2	-0.851138	0.466533	0.778671	1	7.49169e-05	0.000158307	k__Bacteria; p__Firmicutes; c__Clostridia; o__Clostridiales; f__Lachnospiraceae; g__Blautia; s__
b2ab597a902ff227a5ba76030cd6002e	-0.690788	0.470529	0.778671	1	5.93092e-05	8.02681e-05	k__Bacteria; p__Firmicutes; c__Clostridia; o__Clostridiales; f__Ruminococcaceae
2ae8a432208b85a14e86eb821c86ce2b	-0.820023	0.471528	0.778671	1	4.058e-05	0.000100335	k__Bacteria; p__Firmicutes; c__Clostridia; o__Clostridiales
a6099802840e60febef8e896967b7747	0.889028	0.482517	0.784081	1	1.40469e-05	4.45934e-06	k__Bacteria; p__Firmicutes; c__Clostridia; o__Clostridiales; f__[Mogibacteriaceae]; g__; s__
9dc78fd8f2f7cb10e190e77af61c7ecd	0.834111	0.483516	0.784081	1	1.56077e-06	0	k__Bacteria; p__Firmicutes; c__Clostridia; o__Clostridiales; f__Lachnospiraceae
877f27b47c85f6b2d3cf8a6aa86def40	0.836593	0.488511	0.785108	1	0.000899003	0.000216278	k__Bacteria; p__Firmicutes; c__Clostridia; o__Clostridiales; f__Lachnospiraceae; g__; s__
0d3b942348cade7e1c41ac52df03e63e	1.1512	0.501499	0.7959	1	2.18508e-05	0	k__Bacteria; p__Firmicutes; c__Clostridia; o__Clostridiales; f__Veillonellaceae; g__Dialister; s__
4c2189b6b5ced3cb80093414e9449de9	-0.669192	0.507493	0.7959	1	6.24307e-05	9.58758e-05	k__Bacteria; p__Firmicutes; c__Clostridia; o__Clostridiales; f__Ruminococcaceae
d39f37b814ebd81091a949f8bd9d1710	0.661017	0.508492	0.7959	1	0.00960809	0.00749615	k__Bacteria; p__Bacteroidetes; c__Bacteroidia; o__Bacteroidales; f__Bacteroidaceae; g__Bacteroides; s__caccae
686d42b9552375c3b61301ae5605e3a2	0.834111	0.515485	0.79989	1	1.09254e-05	0	k__Bacteria; p__Firmicutes; c__Clostridia; o__Clostridiales; f__Lachnospiraceae; g__Roseburia; s__
e5a43b018c81cedd19e9a5354d32d469	0.621317	0.535465	0.814308	1	0.0368185	0.0268876	k__Bacteria; p__Bacteroidetes; c__Bacteroidia; o__Bacteroidales; f__Bacteroidaceae; g__Bacteroides; s__
03569e3fd843f501355f7853b0ec9361	0.839925	0.539461	0.814308	1	0.000207582	6.68901e-05	k__Bacteria; p__Proteobacteria; c__Betaproteobacteria; o__Burkholderiales; f__Alcaligenaceae; g__Sutterella; s__
8720f9ecd2331ce68e2896df1bf2d977	0.946413	0.545455	0.814308	1	0.000274695	6.68901e-05	k__Bacteria; p__Actinobacteria; c__Coriobacteriia; o__Coriobacteriales; f__Coriobacteriaceae; g__Collinsella; s__aerofaciens
588a23811b3e98af68f4f0fb24a0daa8	-0.752048	0.548452	0.814308	1	4.68231e-05	0.000111483	k__Bacteria; p__Firmicutes; c__Clostridia; o__Clostridiales; f__Lachnospiraceae; g__Coprococcus; s__
2ab8310e1e510f8045c7f4d191fa36be	0.758054	0.553447	0.814308	1	3.43369e-05	1.56077e-05	k__Bacteria; p__Firmicutes; c__Clostridia; o__Clostridiales; f__Lachnospiraceae; g__; s__
51a63d18809e04591820c7e3f3acf0b4	-0.658109	0.555445	0.814308	1	9.67676e-05	0.000127091	k__Bacteria; p__Firmicutes; c__Clostridia; o__Clostridiales; f__Ruminococcaceae; g__; s__
b1f2146bef78066448576fceeb6b644b	-0.767018	0.556444	0.814308	1	1.40469e-05	3.3445e-05	k__Bacteria; p__Firmicutes; c__Clostridia; o__Clostridiales; f__Lachnospiraceae; g__[Ruminococcus]; s__
1fa555f9a74d47a6ca7a65a347bc885f	0.596877	0.568432	0.824889	1	0.000866227	0.000597551	k__Bacteria; p__Firmicutes; c__Clostridia; o__Clostridiales; f__Ruminococcaceae; g__Oscillospira; s__
1ef782a559e3e0a4ab42516e0a2c828f	-0.556927	0.577423	0.824889	1	0.00218039	0.00290972	k__Bacteria; p__Firmicutes; c__Clostridia; o__Clostridiales; f__Lachnospiraceae; g__; s__
c5b4c6b372dbc13b6a7f2d466fc7335f	-0.570752	0.577423	0.824889	1	0.00275788	0.00356301	k__Bacteria; p__Firmicutes; c__Clostridia; o__Clostridiales; f__Lachnospiraceae
ad52a0f6646c574417ce0b13b84acfa9	-0.576945	0.592408	0.836855	1	0.000647719	0.000952069	k__Bacteria; p__Firmicutes; c__Clostridia; o__Clostridiales; f__Ruminococcaceae; g__Ruminococcus; s__bromii
77ad88eed91eef009bf64f101c96baa6	-0.656851	0.602398	0.836855	1	0.000549391	0.00112152	k__Bacteria; p__Firmicutes; c__Clostridia; o__Clostridiales; f__Lachnospiraceae; g__Roseburia; s__
7ce470a3f833253f6d667fa6830abe07	0.624611	0.604396	0.836855	1	2.96546e-05	1.56077e-05	k__Bacteria; p__Firmicutes; c__Clostridia; o__Clostridiales; f__Lachnospiraceae; g__[Ruminococcus]; s__
cae14798faeabb8e1b8840e712839921	0.594923	0.604396	0.836855	1	0.002363	0.0017057	k__Bacteria; p__Bacteroidetes; c__Bacteroidia; o__Bacteroidales; f__Rikenellaceae; g__Alistipes; s__finegoldii
251429848560a80abcb96640ceb102db	-0.601445	0.61039	0.838703	1	1.40469e-05	3.12154e-05	k__Bacteria; p__Firmicutes; c__Clostridia; o__Clostridiales; f__Lachnospiraceae; g__; s__
c82032c40c98975f71892e4be561c87a	-0.576512	0.618382	0.842316	1	0.00320582	0.0039755	k__Bacteria; p__Firmicutes; c__Clostridia; o__Clostridiales; f__Ruminococcaceae; g__Oscillospira; s__
82c890da8759fa9477cd991a1f214b3c	-0.504094	0.622378	0.842316	1	0.000290303	0.000381273	k__Bacteria; p__Firmicutes; c__Clostridia; o__Clostridiales; f__Ruminococcaceae; g__Oscillospira; s__
0c70bdd5631104dd3d818561c9166f6c	-0.541328	0.651349	0.8676	1	0.000847497	0.0010747	k__Bacteria; p__Firmicutes; c__Clostridia; o__Clostridiales; f__Lachnospiraceae; g__Clostridium; s__lavalense
d061a99148d649c4eca4836c5f4b5b68	-0.520135	0.654346	0.8676	1	0.000763216	0.0012553	k__Bacteria; p__Firmicutes; c__Erysipelotrichi; o__Erysipelotrichales; f__Erysipelotrichaceae; g__; s__
04c8be5a3a6ba2d70446812e99318905	-0.459297	0.656344	0.8676	1	0.0319052	0.0357104	k__Bacteria; p__Bacteroidetes; c__Bacteroidia; o__Bacteroidales; f__Bacteroidaceae; g__Bacteroides
3d766867c97f511431bf97e059d6498f	-0.4566	0.66034	0.8676	1	0.00644753	0.00777709	k__Bacteria; p__Bacteroidetes; c__Bacteroidia; o__Bacteroidales; f__Porphyromonadaceae; g__Parabacteroides; s__
7b2ff5940de11da4dc3bb208805dff11	-0.439977	0.67033	0.874343	1	0.000129544	0.000178374	k__Bacteria; p__Firmicutes; c__Clostridia; o__Clostridiales; f__Ruminococcaceae; g__Oscillospira; s__
2fad39e365933a7f925040cb3c2a5ef8	0.834111	0.684316	0.881496	1	6.24307e-06	0	k__Bacteria; p__Actinobacteria; c__Coriobacteriia; o__Coriobacteriales; f__Coriobacteriaceae; g__; s__
a66dd8d31584930c2b0f811f572dddcf	-0.409919	0.689311	0.881496	1	0.0640102	0.0684754	k__Bacteria; p__Bacteroidetes; c__Bacteroidia; o__Bacteroidales; f__Porphyromonadaceae; g__Parabacteroides; s__distasonis
f7686a74ca2d3729eb66305e8a26309b	0.404731	0.695305	0.881496	1	0.000184171	0.000142699	k__Bacteria; p__Firmicutes; c__Clostridia; o__Clostridiales; f__Lachnospiraceae; g__Coprococcus; s__
e2c3ff4f647112723741aa72087f1bfa	0.575709	0.697303	0.881496	1	2.80938e-05	1.56077e-05	k__Bacteria; p__Actinobacteria; c__Actinobacteria; o__Bifidobacteriales; f__Bifidobacteriaceae; g__Bifidobacterium
059c8f8bb468064b134ea6d3661761ea	0.834111	0.7003	0.881496	1	1.56077e-06	0	k__Bacteria; p__Firmicutes; c__Clostridia; o__Clostridiales; f__Lachnospiraceae; g__Lachnospira; s__
59196a586276f0be745d0e334fc071c6	0.457652	0.708292	0.885365	1	0.00141406	0.0011349	k__Bacteria; p__Firmicutes; c__Clostridia; o__Clostridiales; f__Lachnospiraceae; g__Blautia; s__
ada85ea79666bce780693d3893d349cd	-0.367095	0.718282	0.89166	1	0.000440137	0.000532891	k__Bacteria; p__Firmicutes; c__Clostridia; o__Clostridiales; f__Ruminococcaceae; g__; s__
de6891b6f7a1f35bd9ccbc058b9e1a77	-0.872491	0.737263	0.908954	1	1.56077e-06	6.68901e-06	k__Bacteria; p__Firmicutes; c__Clostridia; o__Clostridiales; f__Lachnospiraceae
8a9f7499cdb85b8efa497bb56256cb43	-0.640179	0.749251	0.91745	1	7.80384e-06	2.0067e-05	k__Bacteria; p__Firmicutes; c__Clostridia; o__Clostridiales; f__Lachnospiraceae
959d48a11e3b26c9268f0bd1dae6ec40	0.354425	0.776224	0.944056	1	0.000471352	0.000347828	k__Bacteria; p__Firmicutes; c__Clostridia; o__Clostridiales; f__Lachnospiraceae; g__Blautia; s__obeum
25def15fb42bed6855ede4893d27a21d	-0.249602	0.782218	0.944961	1	0.0754413	0.0836237	k__Bacteria; p__Verrucomicrobia; c__Verrucomicrobiae; o__Verrucomicrobiales; f__Verrucomicrobiaceae; g__Akkermansia; s__muciniphila
c5af8314e36eaed98fc88f181f539e8f	-0.258108	0.793207	0.951848	1	0.000199778	0.000238575	k__Bacteria; p__Firmicutes; c__Clostridia; o__Clostridiales; f__Lachnospiraceae; g__Blautia
ea3433f2c148c6fae4cc2e9ae197f5b8	0.579406	0.839161	0.99292	1	0.000391753	0.000149388	k__Bacteria; p__Firmicutes; c__Clostridia; o__Clostridiales; f__Peptostreptococcaceae
c4f9ef34bd2919511069f409c25de6f1	0.21022	0.847153	0.99292	1	0.00902592	0.00808924	k__Bacteria; p__Bacteroidetes; c__Bacteroidia; o__Bacteroidales; f__Bacteroidaceae; g__Bacteroides; s__
6bbaf2d026d54c61f24b5c5483e56842	-0.17247	0.849151	0.99292	1	0.0164677	0.0176411	k__Bacteria; p__Bacteroidetes; c__Bacteroidia; o__Bacteroidales; f__Porphyromonadaceae; g__Parabacteroides; s__distasonis
552e00cb506f739acaf08aa5641f9d84	0.286058	0.852148	0.99292	1	0.000483838	0.000343369	k__Bacteria; p__Firmicutes; c__Clostridia; o__Clostridiales; f__Lachnospiraceae
9f4d14b114e7499772a797790d81c1db	-0.131182	0.867133	0.99292	1	2.029e-05	2.22967e-05	k__Bacteria; p__Firmicutes; c__Clostridia; o__Clostridiales; f__Lachnospiraceae; g__Coprococcus; s__catus
4b548f1f6fc22f32237396b7d4ffee6e	0.188304	0.868132	0.99292	1	0.000360538	0.00033891	k__Bacteria; p__Firmicutes; c__Clostridia; o__Clostridiales; f__Ruminococcaceae; g__Oscillospira; s__
458157e555a80f9ba01d9da37ef787eb	0.458456	0.869131	0.99292	1	0.000240358	0.000102565	k__Bacteria; p__Firmicutes; c__Clostridia; o__Clostridiales; f__Ruminococcaceae; g__Oscillospira; s__
d6bb5703483ac68992e09ce17683c52f	-0.155841	0.881119	0.99292	1	0.000451062	0.000481609	k__Bacteria; p__Firmicutes; c__Clostridia; o__Clostridiales; f__Ruminococcaceae; g__; s__
3b092a59cd0e2d57483420cc994ec49c	0.674028	0.882118	0.99292	1	0.00962058	0.00188184	k__Bacteria; p__Firmicutes; c__Clostridia; o__Clostridiales; f__Clostridiaceae; g__Clostridium; s__celatum
8a261f382a739bbc5f9494b2c64c2744	0.834111	0.888112	0.99292	1	1.40469e-05	0	k__Bacteria; p__Firmicutes; c__Clostridia; o__Clostridiales; f__Lachnospiraceae; g__Coprococcus; s__
3128e057b1d4f320961e4da677724613	-0.141174	0.888112	0.99292	1	0.00742145	0.00781945	k__Bacteria; p__Firmicutes; c__Clostridia; o__Clostridiales; f__Lachnospiraceae; g__Clostridium; s__symbiosum
180b74e94caf35fac5e1f0f4b7ad9d9f	0.115248	0.917083	1	1	0.000519736	0.000499446	k__Bacteria; p__Bacteroidetes; c__Bacteroidia; o__Bacteroidales; f__[Odoribacteraceae]; g__Odoribacter; s__
2a13ecb6c618ddf8154298c69336dd8e	-0.0680087	0.926074	1	1	0.000435454	0.000459312	k__Bacteria; p__Firmicutes; c__Erysipelotrichi; o__Erysipelotrichales; f__Erysipelotrichaceae; g__Clostridium; s__spiroforme
6a129e8ae637c96e7bb56223913911f7	-0.111182	0.927073	1	1	0.000260648	0.000289857	k__Bacteria; p__Firmicutes; c__Clostridia; o__Clostridiales; f__Lachnospiraceae; g__Coprococcus; s__
10155b2834300619ce0102110a37b057	0.319936	0.934066	1	1	1.87292e-05	1.11483e-05	k__Bacteria; p__Firmicutes; c__Clostridia; o__Clostridiales; f__Lachnospiraceae; g__; s__
2a99ec1157a90661db7ff643b82f1914	-0.0757536	0.944056	1	1	0.0152456	0.0156991	k__Bacteria; p__Bacteroidetes; c__Bacteroidia; o__Bacteroidales; f__Bacteroidaceae; g__Bacteroides; s__fragilis
0f92fcc184a951ff8b0914467ad2f8f9	-0.0650593	0.95005	1	1	0.0114217	0.0116366	k__Bacteria; p__Proteobacteria; c__Deltaproteobacteria; o__Desulfovibrionales; f__Desulfovibrionaceae; g__Bilophila; s__
c942f59feffce9c3ab527135de234101	0.0628353	0.952048	1	1	0.00100201	0.000960987	k__Bacteria; p__Firmicutes; c__Clostridia; o__Clostridiales; f__Lachnospiraceae; g__Roseburia; s__inulinivorans
9099a7f671b923c7b07c12508f17270a	0.355305	0.952048	1	1	3.12154e-05	2.0067e-05	k__Bacteria; p__Firmicutes; c__Clostridia; o__Clostridiales; f__Ruminococcaceae; g__Ruminococcus; s__
5860dac317300b1fe6094e958240cc7f	-0.0322099	0.97003	1	1	0.000134226	0.000138239	k__Bacteria; p__Firmicutes; c__Clostridia; o__Clostridiales; f__Lachnospiraceae; g__Coprococcus; s__
8bb5ff097e0707dca3fe5860af20f4a6	-0.0213218	0.985015	1	1	0.000575924	0.000581944	k__Bacteria; p__Bacteroidetes; c__Bacteroidia; o__Bacteroidales; f__Rikenellaceae; g__; s__
3f1ed51e954b35a8108c12dd882b696b	0.00231527	0.989011	1	1	0.000191975	0.000191752	k__Bacteria; p__Firmicutes; c__Clostridia; o__Clostridiales; f__Ruminococcaceae; g__Oscillospira; s__
0cc2420a6a4698f8bf664d50b17d26b4	0.464835	0.994006	1	1	0.00588722	0.00307471	k__Bacteria; p__Bacteroidetes; c__Bacteroidia; o__Bacteroidales; f__Rikenellaceae; g__Alistipes; s__onderdonkii
7201d53bd647437ec3de879774eba498	0.834111	1	1	1	6.24307e-06	0	k__Bacteria; p__Actinobacteria; c__Coriobacteriia; o__Coriobacteriales; f__Coriobacteriaceae; g__Slackia; s__
be17b29b03ed02bed133932284568d16	0.213473	1	1	1	1.56077e-05	1.11483e-05	k__Bacteria; p__Firmicutes; c__Clostridia; o__Clostridiales; f__Ruminococcaceae
bad4f7c5ada34a1f813946abcfe5c556	0.276129	1	1	1	0.000126422	8.24978e-05	k__Bacteria; p__Firmicutes; c__Clostridia; o__Clostridiales; f__; g__; s__
447b9d6a5c17543a456c597e65b37139	0.834111	1	1	1	1.24861e-05	0	k__Bacteria; p__Firmicutes; c__Clostridia; o__Clostridiales; f__Lachnospiraceae; g__Coprococcus; s__
a650f349bbdffb95b3624519d1ba72b8	nan	nan	1	nan	0	0	k__Bacteria; p__Firmicutes; c__Bacilli; o__Lactobacillales; f__Streptococcaceae; g__Streptococcus; s__
23e5edb47f5a9a45adc62dc95d595ce6	nan	nan	1	nan	0	0	k__Bacteria; p__Bacteroidetes; c__Bacteroidia; o__Bacteroidales; f__Prevotellaceae; g__Prevotella; s__copri
1986030e3c5cd5df6d869054bc96e536	nan	nan	1	nan	0	0	k__Bacteria; p__Proteobacteria; c__Gammaproteobacteria; o__Pasteurellales; f__Pasteurellaceae; g__Haemophilus; s__parainfluenzae

## Sheet: (2) mice-HIV-MSM_vs_HIV+MSM
Relative abundance of 16S sequence variants were compared between recipients of HIV-negative MSM and HIV-positive MSM by nonparametric t-test
Sequence Variant ID	Test-Statistic	P	FDR_P	Bonferroni_P	HIV- MSM mean	HIV+ MSM mean	Taxonomy
993ea35e8ad7ff6894e32247dc507e9b	-2.12832	0.000999001	0.17982	0.17982	5.77484e-05	0.00290303	k__Bacteria; p__Firmicutes; c__Clostridia; o__Clostridiales; f__Lachnospiraceae; g__Blautia; s__producta
919db619ad90cc6b09b31c83d5719da9	-2.69495	0.003996	0.27972	0.719281	0.000254405	0.00298497	k__Bacteria; p__Firmicutes; c__Clostridia; o__Clostridiales; f__Ruminococcaceae; g__Oscillospira; s__
2b982979f2401a8bc447d7141879e9b2	-2.64947	0.00599401	0.27972	1	0.000327761	0.0011735	k__Bacteria; p__Firmicutes; c__Clostridia; o__Clostridiales; f__Lachnospiraceae
bd0f4e14387ee1ac7e5fe586cadbbed4	-2.73647	0.00899101	0.27972	1	3.27761e-05	0.000134616	k__Bacteria; p__Firmicutes; c__Clostridia; o__Clostridiales; f__Christensenellaceae; g__; s__
ad7bc2bb6e1ec90a9bc3c8949bce80d6	-1.64213	0.00999001	0.27972	1	0.000110815	0.00381608	k__Bacteria; p__Firmicutes; c__Clostridia; o__Clostridiales; f__Lachnospiraceae; g__[Ruminococcus]; s__gnavus
9f4d14b114e7499772a797790d81c1db	-2.30115	0.011988	0.27972	1	2.029e-05	0.000204851	k__Bacteria; p__Firmicutes; c__Clostridia; o__Clostridiales; f__Lachnospiraceae; g__Coprococcus; s__catus
74923f4bbde849e27fc4eda25d757e2a	-2.43871	0.012987	0.27972	1	0.000727318	0.00194316	k__Bacteria; p__Firmicutes; c__Erysipelotrichi; o__Erysipelotrichales; f__Erysipelotrichaceae; g__[Eubacterium]; s__dolichum
686d42b9552375c3b61301ae5605e3a2	-2.11099	0.013986	0.27972	1	1.09254e-05	0.00120862	k__Bacteria; p__Firmicutes; c__Clostridia; o__Clostridiales; f__Lachnospiraceae; g__Roseburia; s__
539ca948741b9a713eb781d4281b23fc	-2.27553	0.013986	0.27972	1	0.00089276	0.00291766	k__Bacteria; p__Firmicutes; c__Clostridia; o__Clostridiales; f__Ruminococcaceae; g__Anaerotruncus; s__
79280cea51a6fe8a3432b2f266dd34db	-2.19451	0.018981	0.285597	1	0.00232242	0.0166193	k__Bacteria; p__Firmicutes; c__Clostridia; o__Clostridiales; f__Ruminococcaceae; g__Faecalibacterium; s__prausnitzii
fea3411c847e6627afb5e78b88e2e9af	-2.3436	0.020979	0.285597	1	0.000273134	0.00131105	k__Bacteria; p__Firmicutes; c__Clostridia; o__Clostridiales; f__Lachnospiraceae; g__[Ruminococcus]; s__torques
3e93fd55a231bb99b67a666bad8446a8	-2.17115	0.023976	0.285597	1	0.000145151	0.000752095	k__Bacteria; p__Firmicutes; c__Clostridia; o__Clostridiales; f__Ruminococcaceae; g__Ruminococcus; s__
7ce470a3f833253f6d667fa6830abe07	-2.02587	0.024975	0.285597	1	2.96546e-05	0.000152175	k__Bacteria; p__Firmicutes; c__Clostridia; o__Clostridiales; f__Lachnospiraceae; g__[Ruminococcus]; s__
04195686f2b70585790ec75320de0d6f	-2.00871	0.024975	0.285597	1	0.00067113	0.00519736	k__Bacteria; p__Proteobacteria; c__Gammaproteobacteria; o__Enterobacteriales; f__Enterobacteriaceae
d315a0b30c8e21db4cfe89e65c0b2bf1	-2.28725	0.024975	0.285597	1	6.86738e-05	0.000310203	k__Bacteria; p__Firmicutes; c__Clostridia; o__Clostridiales; f__; g__; s__
cc968157f7691aab95df444e8cd103e2	-2.28237	0.026973	0.285597	1	8.7403e-05	0.000757948	k__Bacteria; p__Firmicutes; c__Clostridia; o__Clostridiales; f__Clostridiaceae; g__Clostridium; s__
959d48a11e3b26c9268f0bd1dae6ec40	1.99309	0.026973	0.285597	1	0.000471352	8.77932e-06	k__Bacteria; p__Firmicutes; c__Clostridia; o__Clostridiales; f__Lachnospiraceae; g__Blautia; s__obeum
48d9883fd871b82d9bbc89cb0447be8c	-1.72405	0.032967	0.32967	1	0.0018776	0.0102777	k__Bacteria; p__Firmicutes; c__Clostridia; o__Clostridiales; f__Lachnospiraceae; g__Clostridium; s__aldenense
eea6b86c0c75e740670ccc50613b1b23	-1.96767	0.038961	0.333952	1	0.00277192	0.00595238	k__Bacteria; p__Firmicutes; c__Clostridia; o__Clostridiales; f__Lachnospiraceae; g__Blautia; s__
ea3433f2c148c6fae4cc2e9ae197f5b8	-1.95136	0.038961	0.333952	1	0.000391753	0.00285621	k__Bacteria; p__Firmicutes; c__Clostridia; o__Clostridiales; f__Peptostreptococcaceae
6c7fa77831ae630967a6fbfc8ee47901	-2.05643	0.038961	0.333952	1	0.000265331	0.000968652	k__Bacteria; p__Firmicutes; c__Clostridia; o__Clostridiales; f__Lachnospiraceae; g__Clostridium; s__clostridioforme
113ce005a880987438bdbe19ee22add8	-1.85609	0.043956	0.35964	1	0.000906807	0.00246406	k__Bacteria; p__Firmicutes; c__Bacilli; o__Turicibacterales; f__Turicibacteraceae; g__Turicibacter; s__
8ce931b0c99ad5ed648c25483c1ca492	-1.8734	0.047952	0.375277	1	0.00189477	0.00530271	k__Bacteria; p__Firmicutes; c__Erysipelotrichi; o__Erysipelotrichales; f__Erysipelotrichaceae; g__Clostridium; s__ramosum
0f92fcc184a951ff8b0914467ad2f8f9	1.94395	0.0509491	0.382118	1	0.0114217	0.00489301	k__Bacteria; p__Proteobacteria; c__Deltaproteobacteria; o__Desulfovibrionales; f__Desulfovibrionaceae; g__Bilophila; s__
77ad88eed91eef009bf64f101c96baa6	-1.90943	0.0559441	0.402797	1	0.000549391	0.00539636	k__Bacteria; p__Firmicutes; c__Clostridia; o__Clostridiales; f__Lachnospiraceae; g__Roseburia; s__
f7686a74ca2d3729eb66305e8a26309b	1.86424	0.0599401	0.41497	1	0.000184171	0	k__Bacteria; p__Firmicutes; c__Clostridia; o__Clostridiales; f__Lachnospiraceae; g__Coprococcus; s__
cae14798faeabb8e1b8840e712839921	1.77322	0.0629371	0.41958	1	0.002363	0.000318982	k__Bacteria; p__Bacteroidetes; c__Bacteroidia; o__Bacteroidales; f__Rikenellaceae; g__Alistipes; s__finegoldii
c162a4f3943238810eba8a25f0563cca	1.81865	0.0659341	0.423862	1	0.204893	0.120915	k__Bacteria; p__Bacteroidetes; c__Bacteroidia; o__Bacteroidales; f__Bacteroidaceae; g__Bacteroides
b1f2146bef78066448576fceeb6b644b	-1.78206	0.0689311	0.427848	1	1.40469e-05	8.48668e-05	k__Bacteria; p__Firmicutes; c__Clostridia; o__Clostridiales; f__Lachnospiraceae; g__[Ruminococcus]; s__
90c2b51afe404951ec89bd52c7ae1f58	1.70479	0.0739261	0.443556	1	0.000273134	0.000119984	k__Bacteria; p__Firmicutes; c__Clostridia; o__Clostridiales; f__Lachnospiraceae; g__Dorea; s__
2a13ecb6c618ddf8154298c69336dd8e	-1.78269	0.0799201	0.464052	1	0.000435454	0.0031986	k__Bacteria; p__Firmicutes; c__Erysipelotrichi; o__Erysipelotrichales; f__Erysipelotrichaceae; g__Clostridium; s__spiroforme
39bb3fb5b2257fd2eacca408dc42c5d1	-1.59097	0.0909091	0.511364	1	7.49169e-05	0.000348246	k__Bacteria; p__Firmicutes; c__Clostridia; o__Clostridiales; f__Lachnospiraceae; g__; s__
82c890da8759fa9477cd991a1f214b3c	-1.76568	0.112887	0.570929	1	0.000290303	0.00291474	k__Bacteria; p__Firmicutes; c__Clostridia; o__Clostridiales; f__Ruminococcaceae; g__Oscillospira; s__
059c8f8bb468064b134ea6d3661761ea	-1.6009	0.112887	0.570929	1	1.56077e-06	7.3161e-05	k__Bacteria; p__Firmicutes; c__Clostridia; o__Clostridiales; f__Lachnospiraceae; g__Lachnospira; s__
89aabf43d24dd5bd0fd0f5aca189d341	-1.60232	0.113886	0.570929	1	1.09254e-05	6.73081e-05	k__Bacteria; p__Firmicutes; c__Clostridia; o__Clostridiales; f__Lachnospiraceae; g__Dorea; s__formicigenerans
6bbaf2d026d54c61f24b5c5483e56842	1.64433	0.114885	0.570929	1	0.0164677	0.00541977	k__Bacteria; p__Bacteroidetes; c__Bacteroidia; o__Bacteroidales; f__Porphyromonadaceae; g__Parabacteroides; s__distasonis
370829fece3190f1a8efccf50b7d0921	-1.56519	0.120879	0.570929	1	0.00751978	0.0120716	k__Bacteria; p__Firmicutes; c__Clostridia; o__Clostridiales; f__Ruminococcaceae; g__Oscillospira; s__
4b548f1f6fc22f32237396b7d4ffee6e	-1.52661	0.125874	0.570929	1	0.000360538	0.000769654	k__Bacteria; p__Firmicutes; c__Clostridia; o__Clostridiales; f__Ruminococcaceae; g__Oscillospira; s__
4c2189b6b5ced3cb80093414e9449de9	1.58626	0.126873	0.570929	1	6.24307e-05	5.85288e-06	k__Bacteria; p__Firmicutes; c__Clostridia; o__Clostridiales; f__Ruminococcaceae
fd1f139259c53276619476db0cc81913	-1.48676	0.126873	0.570929	1	0.0016154	0.00581484	k__Bacteria; p__Firmicutes; c__Clostridia; o__Clostridiales; f__Lachnospiraceae; g__Blautia; s__
4c731267e801c2afe253b5cbb58bdd24	-1.53293	0.131868	0.578933	1	4.83838e-05	0.000184366	k__Bacteria; p__Firmicutes; c__Clostridia; o__Clostridiales; f__Lachnospiraceae; g__Dorea; s__
3128e057b1d4f320961e4da677724613	-1.48546	0.138861	0.595119	1	0.00742145	0.013605	k__Bacteria; p__Firmicutes; c__Clostridia; o__Clostridiales; f__Lachnospiraceae; g__Clostridium; s__symbiosum
2a99ec1157a90661db7ff643b82f1914	-1.40714	0.150849	0.607393	1	0.0152456	0.0362381	k__Bacteria; p__Bacteroidetes; c__Bacteroidia; o__Bacteroidales; f__Bacteroidaceae; g__Bacteroides; s__fragilis
57e77761c7d4464a3968f059b4a9afcc	1.48285	0.150849	0.607393	1	0.000977041	0.000307276	k__Bacteria; p__Firmicutes; c__Clostridia; o__Clostridiales; f__Ruminococcaceae; g__; s__
f10155af1849a17996f302d71b32398c	-1.33213	0.151848	0.607393	1	4.21408e-05	0.000239968	k__Bacteria; p__Firmicutes; c__Clostridia; o__Clostridiales; f__Lachnospiraceae
c942f59feffce9c3ab527135de234101	-1.349	0.156843	0.613734	1	0.00100201	0.0042053	k__Bacteria; p__Firmicutes; c__Clostridia; o__Clostridiales; f__Lachnospiraceae; g__Roseburia; s__inulinivorans
bfb7bb16ab570748b3a5d099e9426af1	-1.43639	0.161838	0.619806	1	0.000338687	0.00131397	k__Bacteria; p__Firmicutes; c__Clostridia; o__Clostridiales; f__Ruminococcaceae; g__; s__
46d8ab5615f60d7b522f3590976668be	-1.4523	0.166833	0.625624	1	2.18508e-05	7.3161e-05	k__Bacteria; p__Firmicutes; c__Clostridia; o__Clostridiales; f__; g__; s__
3d766867c97f511431bf97e059d6498f	-1.41543	0.176823	0.644638	1	0.00644753	0.0103069	k__Bacteria; p__Bacteroidetes; c__Bacteroidia; o__Bacteroidales; f__Porphyromonadaceae; g__Parabacteroides; s__
138daeaeee1211d2a3d8502b8fe23b2a	1.41491	0.17982	0.644638	1	0.00022319	3.80437e-05	k__Bacteria; p__Bacteroidetes; c__Bacteroidia; o__Bacteroidales; f__S24-7; g__; s__
010f0ac2691bc0be12d0633d4b5d2cc4	1.32829	0.184815	0.644638	1	0.00302633	0.000479936	k__Bacteria; p__Firmicutes; c__Clostridia; o__Clostridiales; f__Ruminococcaceae; g__Faecalibacterium; s__prausnitzii
7b2ff5940de11da4dc3bb208805dff11	-1.40775	0.187812	0.644638	1	0.000129544	0.000485789	k__Bacteria; p__Firmicutes; c__Clostridia; o__Clostridiales; f__Ruminococcaceae; g__Oscillospira; s__
a24dae6b87885a55d81df1ea6d1abaf5	1.3373	0.18981	0.644638	1	0.000429211	2.6338e-05	k__Bacteria; p__Firmicutes; c__Clostridia; o__Clostridiales; f__Lachnospiraceae; g__; s__
60c57911662a9159dfdd0fc05d975a55	1.27733	0.202797	0.665335	1	0.000688299	0.000166807	k__Bacteria; p__Firmicutes; c__Clostridia; o__Clostridiales; f__Ruminococcaceae; g__Gemmiger; s__formicilis
8a83cfd5eb074b5dbc6118eb03ef915e	-1.31154	0.206793	0.665335	1	0.00452467	0.00973334	k__Bacteria; p__Bacteroidetes; c__Bacteroidia; o__Bacteroidales; f__[Odoribacteraceae]; g__Butyricimonas; s__
3233034b11dfc584717d9264882a4fce	-1.29759	0.207792	0.665335	1	0.000451062	0.000877932	k__Bacteria; p__Firmicutes; c__Clostridia; o__Clostridiales; f__Ruminococcaceae
bda6b6e7da7508c68057140e7bd6cd8d	1.15385	0.210789	0.665335	1	0.00116277	1.17058e-05	k__Bacteria; p__Firmicutes; c__Clostridia; o__Clostridiales; f__Ruminococcaceae; g__Oscillospira; s__
10cd502b01abafc87e2ecbad86389286	1.22804	0.218781	0.665335	1	0.000163881	0	k__Bacteria; p__Firmicutes; c__Clostridia; o__Clostridiales; f__Lachnospiraceae; g__; s__
74ec9fe6ffab4ecff6d5def74298a825	1.19975	0.220779	0.665335	1	0.00954878	0.00563047	k__Bacteria; p__Firmicutes; c__Clostridia; o__Clostridiales; f__Lachnospiraceae; g__Clostridium
0b05a2e48cdc5f9e766bb0f4c209d4b4	-1.286	0.221778	0.665335	1	0.000176367	0.000278012	k__Bacteria; p__Firmicutes; c__Clostridia; o__Clostridiales; f__Ruminococcaceae; g__Oscillospira; s__
c4f9ef34bd2919511069f409c25de6f1	-1.26447	0.22977	0.667075	1	0.00902592	0.0193994	k__Bacteria; p__Bacteroidetes; c__Bacteroidia; o__Bacteroidales; f__Bacteroidaceae; g__Bacteroides; s__
0d3b942348cade7e1c41ac52df03e63e	1.00262	0.22977	0.667075	1	2.18508e-05	0	k__Bacteria; p__Firmicutes; c__Clostridia; o__Clostridiales; f__Veillonellaceae; g__Dialister; s__
8937656c16c20701c107e715bad86732	1.20242	0.234765	0.670758	1	0.00101762	3.80437e-05	k__Bacteria; p__Firmicutes; c__Clostridia; o__Clostridiales; f__Lachnospiraceae; g__Roseburia; s__faecis
4be97abf1ab678a8322783fab899c3a4	-1.18532	0.238761	0.671516	1	8.89638e-05	0.00017266	k__Bacteria; p__Firmicutes; c__Clostridia; o__Clostridiales; f__Ruminococcaceae; g__Anaerofilum; s__
04c8be5a3a6ba2d70446812e99318905	1.22847	0.242757	0.672251	1	0.0319052	0.0204997	k__Bacteria; p__Bacteroidetes; c__Bacteroidia; o__Bacteroidales; f__Bacteroidaceae; g__Bacteroides
25def15fb42bed6855ede4893d27a21d	1.18345	0.24975	0.681137	1	0.0754413	0.0368	k__Bacteria; p__Verrucomicrobia; c__Verrucomicrobiae; o__Verrucomicrobiales; f__Verrucomicrobiaceae; g__Akkermansia; s__muciniphila
7e17a5137fd9dab8c02617a186088c4d	-1.15192	0.260739	0.700494	1	0.000148273	0.000397996	k__Bacteria; p__Firmicutes; c__Clostridia; o__Clostridiales; f__Ruminococcaceae; g__; s__
7c82a2ef7685c5c6dc3080f56033cee9	1.14877	0.270729	0.714069	1	0.000132665	6.43817e-05	k__Bacteria; p__Proteobacteria; c__Betaproteobacteria; o__Burkholderiales; f__Oxalobacteraceae; g__Oxalobacter; s__formigenes
61795ee8e60f4a0f66080ab812573fb8	1.18221	0.273726	0.714069	1	0.00319958	0.000997916	k__Bacteria; p__Firmicutes; c__Clostridia; o__Clostridiales; f__Lachnospiraceae
ca9dec36ad0aa5a1473144ddcb74951d	1.17715	0.280719	0.72185	1	0.00436703	0.00138128	k__Bacteria; p__Firmicutes; c__Clostridia; o__Clostridiales; f__Ruminococcaceae
f9f5f08e8da4cc9740518223846563db	-1.12853	0.298701	0.751608	1	0.000149834	0.000400922	k__Bacteria; p__Bacteroidetes; c__Bacteroidia; o__Bacteroidales; f__Rikenellaceae; g__; s__
4311a44a7d56ce4086afad3e75bedd6e	1.07658	0.301698	0.751608	1	0.00844376	0.00562462	k__Bacteria; p__Firmicutes; c__Clostridia; o__Clostridiales; f__Ruminococcaceae
41239266f2952a56a313fc4798f28a1c	1.30684	0.30969	0.751608	1	0.000998892	0	k__Bacteria; p__Firmicutes; c__Clostridia; o__Clostridiales; f__; g__; s__
92f000f936d3f349c5e7719a5edc5078	1.1101	0.310689	0.751608	1	0.000326201	0.000108278	k__Bacteria; p__Firmicutes; c__Clostridia; o__Clostridiales; f__Lachnospiraceae; g__; s__
a6099802840e60febef8e896967b7747	1.20836	0.314685	0.751608	1	1.40469e-05	0	k__Bacteria; p__Firmicutes; c__Clostridia; o__Clostridiales; f__[Mogibacteriaceae]; g__; s__
2ab8310e1e510f8045c7f4d191fa36be	1.06566	0.321678	0.751608	1	3.43369e-05	5.85288e-06	k__Bacteria; p__Firmicutes; c__Clostridia; o__Clostridiales; f__Lachnospiraceae; g__; s__
7ebc04cb539befd9f2e7faa131628c66	-1.14523	0.334665	0.751608	1	2.029e-05	7.60875e-05	k__Bacteria; p__Firmicutes; c__Clostridia; o__Clostridiales; f__[Mogibacteriaceae]; g__; s__
1ef782a559e3e0a4ab42516e0a2c828f	1.03314	0.336663	0.751608	1	0.00218039	0.00101255	k__Bacteria; p__Firmicutes; c__Clostridia; o__Clostridiales; f__Lachnospiraceae; g__; s__
9f74473636e6874853d88dfcbcecff49	-1.02253	0.342657	0.751608	1	2.18508e-05	4.09702e-05	k__Bacteria; p__Firmicutes; c__Bacilli; o__Lactobacillales; f__Streptococcaceae; g__Lactococcus; s__
03569e3fd843f501355f7853b0ec9361	-1.01085	0.345654	0.751608	1	0.000207582	0.000535539	k__Bacteria; p__Proteobacteria; c__Betaproteobacteria; o__Burkholderiales; f__Alcaligenaceae; g__Sutterella; s__
992072d045462445dc239b35300af2cc	-1.38313	0.345654	0.751608	1	0	2.04851e-05	k__Bacteria; p__Bacteroidetes; c__Bacteroidia; o__Bacteroidales; f__Prevotellaceae; g__Prevotella; s__copri
e5a43b018c81cedd19e9a5354d32d469	0.943148	0.346653	0.751608	1	0.0368185	0.0193408	k__Bacteria; p__Bacteroidetes; c__Bacteroidia; o__Bacteroidales; f__Bacteroidaceae; g__Bacteroides; s__
6c4de756c45fa6e7e5adfe196f9f0039	-1.12126	0.353646	0.751608	1	1.40469e-05	9.07197e-05	k__Bacteria; p__Firmicutes; c__Clostridia; o__Clostridiales; f__Lachnospiraceae; g__Coprococcus; s__
6a129e8ae637c96e7bb56223913911f7	1.05528	0.353646	0.751608	1	0.000260648	8.77932e-06	k__Bacteria; p__Firmicutes; c__Clostridia; o__Clostridiales; f__Lachnospiraceae; g__Coprococcus; s__
3f1ed51e954b35a8108c12dd882b696b	0.977612	0.356643	0.751608	1	0.000191975	0.000102425	k__Bacteria; p__Firmicutes; c__Clostridia; o__Clostridiales; f__Ruminococcaceae; g__Oscillospira; s__
217185aee687740c4fa3cc0aa17ee4ff	-0.984663	0.35964	0.751608	1	0.000404239	0.000910123	k__Bacteria; p__Firmicutes; c__Erysipelotrichi; o__Erysipelotrichales; f__Erysipelotrichaceae; g__Catenibacterium; s__
ea2b0e4a93c24c6c3661cbe347f93b74	0.961815	0.367632	0.751608	1	0.0568042	0.043086	k__Bacteria; p__Bacteroidetes; c__Bacteroidia; o__Bacteroidales; f__Bacteroidaceae; g__Bacteroides; s__uniformis
9dc78fd8f2f7cb10e190e77af61c7ecd	-1.07721	0.371628	0.751608	1	1.56077e-06	8.77932e-06	k__Bacteria; p__Firmicutes; c__Clostridia; o__Clostridiales; f__Lachnospiraceae
f45b62ab6ec22fb20364a7e05088158f	1.18079	0.371628	0.751608	1	0.000148273	0	k__Bacteria; p__Firmicutes; c__Clostridia; o__Clostridiales; f__Lachnospiraceae
b955f67a541a149dd3b179dc62d37a72	0.971353	0.376623	0.753247	1	0.000229433	0.000111205	k__Bacteria; p__Firmicutes; c__Clostridia; o__Clostridiales; f__[Mogibacteriaceae]; g__; s__
d061a99148d649c4eca4836c5f4b5b68	1.05655	0.391608	0.77461	1	0.000763216	1.46322e-05	k__Bacteria; p__Firmicutes; c__Erysipelotrichi; o__Erysipelotrichales; f__Erysipelotrichaceae; g__; s__
ee02d6d3506da57909d5e603709a295f	-1.16478	0.411588	0.805282	1	0.000237237	0.00082233	k__Bacteria; p__Firmicutes; c__Clostridia; o__Clostridiales; f__Lachnospiraceae; g__; s__
0f6200a5b77099113b52eea9a8645181	-0.835439	0.427572	0.82756	1	0.00127359	0.00185536	k__Bacteria; p__Firmicutes; c__Erysipelotrichi; o__Erysipelotrichales; f__Erysipelotrichaceae; g__[Eubacterium]; s__biforme
3f55a8ca784ae7190790023a30cd859c	0.924279	0.455544	0.872319	1	0.0237877	0.00454476	k__Bacteria; p__Bacteroidetes; c__Bacteroidia; o__Bacteroidales; f__Porphyromonadaceae; g__Parabacteroides; s__gordonii
4faf0d1e462b85e630eaa40b17d8d744	-0.825832	0.463536	0.87828	1	0.000160759	0.000257527	k__Bacteria; p__Firmicutes; c__Clostridia; o__Clostridiales; f__; g__; s__
a3607a88a8ed64e24a374847b23e404f	0.846375	0.472527	0.880563	1	0.00046667	0.000175586	k__Bacteria; p__Firmicutes; c__Clostridia; o__Clostridiales; f__Ruminococcaceae; g__Ruminococcus; s__
8bb5ff097e0707dca3fe5860af20f4a6	0.725705	0.474525	0.880563	1	0.000575924	0.000389217	k__Bacteria; p__Bacteroidetes; c__Bacteroidia; o__Bacteroidales; f__Rikenellaceae; g__; s__
d6bb5703483ac68992e09ce17683c52f	0.731807	0.492507	0.892791	1	0.000451062	0.00030435	k__Bacteria; p__Firmicutes; c__Clostridia; o__Clostridiales; f__Ruminococcaceae; g__; s__
32382a0f5831da5faee464d011b5616c	0.743986	0.5005	0.892791	1	0.000397996	0.00017266	k__Bacteria; p__Firmicutes; c__Clostridia; o__Clostridiales; f__Lachnospiraceae; g__Lachnobacterium; s__
877f27b47c85f6b2d3cf8a6aa86def40	-0.870088	0.506494	0.892791	1	0.000899003	0.00200754	k__Bacteria; p__Firmicutes; c__Clostridia; o__Clostridiales; f__Lachnospiraceae; g__; s__
ada85ea79666bce780693d3893d349cd	-0.665324	0.509491	0.892791	1	0.000440137	0.000637964	k__Bacteria; p__Firmicutes; c__Clostridia; o__Clostridiales; f__Ruminococcaceae; g__; s__
2ae8a432208b85a14e86eb821c86ce2b	-0.830687	0.512488	0.892791	1	4.058e-05	0.000108278	k__Bacteria; p__Firmicutes; c__Clostridia; o__Clostridiales
1a389bf765c8ff0f92600f684fbe7ad7	0.639299	0.514486	0.892791	1	0.00014203	6.73081e-05	k__Bacteria; p__Firmicutes; c__Clostridia; o__Clostridiales; f__Ruminococcaceae; g__Faecalibacterium; s__prausnitzii
363c1c39d58bce4fc3218659d0944258	0.658681	0.516484	0.892791	1	0.000761655	0.000441893	k__Bacteria; p__Firmicutes; c__Clostridia; o__Clostridiales; f__Lachnospiraceae
251429848560a80abcb96640ceb102db	1.0387	0.523477	0.892791	1	1.40469e-05	0	k__Bacteria; p__Firmicutes; c__Clostridia; o__Clostridiales; f__Lachnospiraceae; g__; s__
b0645cbec7653c887cb868a248d95874	0.843537	0.538462	0.892791	1	0.00155296	0.000152175	k__Bacteria; p__Firmicutes; c__Clostridia; o__Clostridiales; f__Ruminococcaceae; g__Faecalibacterium; s__prausnitzii
5860dac317300b1fe6094e958240cc7f	-0.760785	0.55045	0.892791	1	0.000134226	0.000295571	k__Bacteria; p__Firmicutes; c__Clostridia; o__Clostridiales; f__Lachnospiraceae; g__Coprococcus; s__
10155b2834300619ce0102110a37b057	-0.833397	0.552448	0.892791	1	1.87292e-05	4.97495e-05	k__Bacteria; p__Firmicutes; c__Clostridia; o__Clostridiales; f__Lachnospiraceae; g__; s__
e82ab12c51a893c6d7938a16632199a8	-0.632623	0.555445	0.892791	1	0.00518799	0.0101928	k__Bacteria; p__Firmicutes; c__Clostridia; o__Clostridiales; f__Lachnospiraceae
1aab913302590e21a7be28b1494a3320	-0.602786	0.555445	0.892791	1	6.087e-05	7.90139e-05	k__Bacteria; p__Firmicutes; c__Clostridia; o__Clostridiales; f__Ruminococcaceae; g__Oscillospira; s__
d39f37b814ebd81091a949f8bd9d1710	0.569664	0.563437	0.892791	1	0.00960809	0.00764386	k__Bacteria; p__Bacteroidetes; c__Bacteroidia; o__Bacteroidales; f__Bacteroidaceae; g__Bacteroides; s__caccae
32a21601ca89d1f2629c1a9fc2de4359	-0.613832	0.563437	0.892791	1	0.00398776	0.00543147	k__Bacteria; p__Bacteroidetes; c__Bacteroidia; o__Bacteroidales; f__[Paraprevotellaceae]; g__Paraprevotella; s__
2319f9fecaef59a51537cdcb69cf5615	0.565578	0.564436	0.892791	1	0.000443258	0.000280938	k__Bacteria; p__Firmicutes; c__Clostridia; o__Clostridiales; f__Ruminococcaceae
0cc2420a6a4698f8bf664d50b17d26b4	0.757261	0.565435	0.892791	1	0.00588722	0.00069064	k__Bacteria; p__Bacteroidetes; c__Bacteroidia; o__Bacteroidales; f__Rikenellaceae; g__Alistipes; s__onderdonkii
ac5402de1ddf427ab8d2b0a8a0a44f19	-0.589248	0.572428	0.895974	1	0.0254702	0.0308769	k__Bacteria; p__Bacteroidetes; c__Bacteroidia; o__Bacteroidales; f__Bacteroidaceae; g__Bacteroides; s__
c5af8314e36eaed98fc88f181f539e8f	-0.555905	0.596404	0.925454	1	0.000199778	0.000266306	k__Bacteria; p__Firmicutes; c__Clostridia; o__Clostridiales; f__Lachnospiraceae; g__Blautia
a167e4d4418792dcaba877443ed0e66d	-0.556054	0.602398	0.926766	1	0.000424529	0.000585288	k__Bacteria; p__Bacteroidetes; c__Bacteroidia; o__Bacteroidales; f__[Odoribacteraceae]; g__Butyricimonas; s__
59196a586276f0be745d0e334fc071c6	0.588976	0.623377	0.950478	1	0.00141406	0.00099499	k__Bacteria; p__Firmicutes; c__Clostridia; o__Clostridiales; f__Lachnospiraceae; g__Blautia; s__
f12011ad5219b22b6ca790103333a755	0.493967	0.628372	0.950478	1	0.00064928	0.000497495	k__Bacteria; p__Firmicutes; c__Clostridia; o__Clostridiales; f__Ruminococcaceae; g__Oscillospira; s__
1e6fb78e2244ca940f9fc31d88d711dc	0.486836	0.642358	0.963536	1	0.000187292	0.000134616	k__Bacteria; p__Firmicutes; c__Clostridia; o__Clostridiales; f__[Mogibacteriaceae]; g__Mogibacterium; s__
d05c86b5bfc092d8677507fb1eae8d66	-0.669626	0.649351	0.965976	1	0.000549391	0.00105937	k__Bacteria; p__Firmicutes; c__Clostridia; o__Clostridiales; f__Ruminococcaceae; g__Ruminococcus; s__
552e00cb506f739acaf08aa5641f9d84	0.676493	0.657343	0.96985	1	0.000483838	0.000140469	k__Bacteria; p__Firmicutes; c__Clostridia; o__Clostridiales; f__Lachnospiraceae
34cddd9fe152c24d78924ef25927d67c	0.472142	0.665335	0.97366	1	0.00609792	0.00434869	k__Bacteria; p__Firmicutes; c__Clostridia; o__Clostridiales; f__Lachnospiraceae; g__Clostridium; s__hathewayi
180b74e94caf35fac5e1f0f4b7ad9d9f	0.393243	0.696304	1	1	0.000519736	0.000444819	k__Bacteria; p__Bacteroidetes; c__Bacteroidia; o__Bacteroidales; f__[Odoribacteraceae]; g__Odoribacter; s__
7201d53bd647437ec3de879774eba498	-0.690584	0.707293	1	1	6.24307e-06	1.46322e-05	k__Bacteria; p__Actinobacteria; c__Coriobacteriia; o__Coriobacteriales; f__Coriobacteriaceae; g__Slackia; s__
fdb1c35a8dab336d65ed22d796e71e4b	-0.396334	0.72028	1	1	7.64777e-05	9.36461e-05	k__Bacteria; p__Actinobacteria; c__Coriobacteriia; o__Coriobacteriales; f__Coriobacteriaceae; g__; s__
0681937d15d01090c93f3fb99998d90c	-0.515089	0.722278	1	1	0.000767898	0.00118814	k__Bacteria; p__Proteobacteria; c__Deltaproteobacteria; o__Desulfovibrionales; f__Desulfovibrionaceae; g__Desulfovibrio; s__
599ba6458e91e2527f358f547ea39261	0.417648	0.74026	1	1	0.00178396	0.00136665	k__Bacteria; p__Firmicutes; c__Clostridia; o__Clostridiales; f__Lachnospiraceae; g__Blautia; s__
40a6b537d995aeb12b0100e2cb6ad879	0.476278	0.759241	1	1	3.58977e-05	2.04851e-05	k__Bacteria; p__Firmicutes; c__Clostridia; o__Clostridiales; f__Lachnospiraceae; g__Blautia; s__
72d6ddeb60679dd2e2844fe039e1a760	0.30572	0.764236	1	1	0.00649124	0.00563047	k__Bacteria; p__Proteobacteria; c__Deltaproteobacteria; o__Desulfovibrionales; f__Desulfovibrionaceae; g__; s__
c5b4c6b372dbc13b6a7f2d466fc7335f	-0.385881	0.774226	1	1	0.00275788	0.00346491	k__Bacteria; p__Firmicutes; c__Clostridia; o__Clostridiales; f__Lachnospiraceae
2403a466dd6d1e4f551d80394c2aa994	-0.253998	0.779221	1	1	0.0121475	0.013567	k__Bacteria; p__Bacteroidetes; c__Bacteroidia; o__Bacteroidales; f__[Paraprevotellaceae]; g__Paraprevotella; s__
30207d209491dfb7de83344e77fd6fbd	0.294679	0.784216	1	1	0.00163412	0.00140762	k__Bacteria; p__Firmicutes; c__Clostridia; o__Clostridiales; f__; g__; s__
588a23811b3e98af68f4f0fb24a0daa8	0.941463	0.786214	1	1	4.68231e-05	0	k__Bacteria; p__Firmicutes; c__Clostridia; o__Clostridiales; f__Lachnospiraceae; g__Coprococcus; s__
ba88d4e4e6a24ecc2a5aab6bdfbb77f5	0.327374	0.8002	1	1	0.00018261	0.000125837	k__Bacteria; p__Firmicutes; c__Clostridia; o__Clostridiales; f__Ruminococcaceae; g__Oscillospira; s__
e2c3ff4f647112723741aa72087f1bfa	-0.247826	0.81019	1	1	2.80938e-05	3.51173e-05	k__Bacteria; p__Actinobacteria; c__Actinobacteria; o__Bifidobacteriales; f__Bifidobacteriaceae; g__Bifidobacterium
f596fa835cdfdb22d6494b012f61fff2	-0.295514	0.821179	1	1	7.49169e-05	9.36461e-05	k__Bacteria; p__Firmicutes; c__Clostridia; o__Clostridiales; f__Lachnospiraceae; g__Blautia; s__
436497b0e3edb384200f5b9b82883182	-0.226003	0.831169	1	1	0.00125486	0.00140177	k__Bacteria; p__Firmicutes; c__Clostridia; o__Clostridiales; f__Ruminococcaceae; g__; s__
86deb5cf8d6f29d383136e0d09863b69	0.190326	0.84016	1	1	0.00155609	0.00139299	k__Bacteria; p__Firmicutes; c__Erysipelotrichi; o__Erysipelotrichales; f__Erysipelotrichaceae; g__Holdemania; s__
2c1dcc76478dfbb19fa59690738202c6	0.235096	0.854146	1	1	0.000160759	0.00013169	k__Bacteria; p__Firmicutes; c__Clostridia; o__Clostridiales; f__Lachnospiraceae; g__[Ruminococcus]; s__gnavus
6a17479edbe461431433bddb084f731e	0.170349	0.857143	1	1	0.00710306	0.00635038	k__Bacteria; p__Proteobacteria; c__Betaproteobacteria; o__Burkholderiales; f__Alcaligenaceae; g__Sutterella; s__
a66dd8d31584930c2b0f811f572dddcf	0.183943	0.87013	1	1	0.0640102	0.0614787	k__Bacteria; p__Bacteroidetes; c__Bacteroidia; o__Bacteroidales; f__Porphyromonadaceae; g__Parabacteroides; s__distasonis
0c70bdd5631104dd3d818561c9166f6c	0.165671	0.874126	1	1	0.000847497	0.000787213	k__Bacteria; p__Firmicutes; c__Clostridia; o__Clostridiales; f__Lachnospiraceae; g__Clostridium; s__lavalense
51a63d18809e04591820c7e3f3acf0b4	-0.183386	0.879121	1	1	9.67676e-05	0.000105352	k__Bacteria; p__Firmicutes; c__Clostridia; o__Clostridiales; f__Ruminococcaceae; g__; s__
e6a34eb113dba66df0b8bbec907a8f5d	0.108127	0.899101	1	1	0.00317148	0.00292351	k__Bacteria; p__Bacteroidetes; c__Bacteroidia; o__Bacteroidales; f__Rikenellaceae; g__Alistipes; s__putredinis
149e7d5e484d157f2ac6140a2111618e	0.48467	0.899101	1	1	0.00014203	5.85288e-05	k__Bacteria; p__Firmicutes; c__Clostridia; o__Clostridiales; f__Ruminococcaceae; g__Faecalibacterium; s__prausnitzii
b2ab597a902ff227a5ba76030cd6002e	-0.149959	0.899101	1	1	5.93092e-05	6.43817e-05	k__Bacteria; p__Firmicutes; c__Clostridia; o__Clostridiales; f__Ruminococcaceae
9099a7f671b923c7b07c12508f17270a	-0.293256	0.911089	1	1	3.12154e-05	4.38966e-05	k__Bacteria; p__Firmicutes; c__Clostridia; o__Clostridiales; f__Ruminococcaceae; g__Ruminococcus; s__
1ad289cd8f44e109fd95de0382c5b252	-0.125847	0.915085	1	1	0.00277349	0.00302301	k__Bacteria; p__Firmicutes; c__Clostridia; o__Clostridiales; f__Lachnospiraceae; g__Clostridium; s__hathewayi
96b08b31f324f113c7b260a50f09860c	-0.0781939	0.925075	1	1	0.00335721	0.00352929	k__Bacteria; p__Bacteroidetes; c__Bacteroidia; o__Bacteroidales; f__[Odoribacteraceae]; g__Butyricimonas; s__
904ad13c7b8512200836d5cd9fb09e1b	-0.0812163	0.925075	1	1	9.67676e-05	0.000102425	k__Bacteria; p__Bacteroidetes; c__Bacteroidia; o__Bacteroidales; f__Rikenellaceae; g__Alistipes; s__indistinctus
8f1c11c7b732265cbfc1bb7dbd0241e7	-0.15665	0.926074	1	1	1.24861e-05	1.46322e-05	k__Bacteria; p__Firmicutes; c__Clostridia; o__Clostridiales; f__Lachnospiraceae; g__; s__
340a5698fe78713b785c3bcce89df73b	0.104864	0.931069	1	1	0.00014203	0.000134616	k__Bacteria; p__Bacteroidetes; c__Bacteroidia; o__Bacteroidales; f__Rikenellaceae; g__; s__
8a261f382a739bbc5f9494b2c64c2744	-0.151818	0.939061	1	1	1.40469e-05	1.75586e-05	k__Bacteria; p__Firmicutes; c__Clostridia; o__Clostridiales; f__Lachnospiraceae; g__Coprococcus; s__
458157e555a80f9ba01d9da37ef787eb	0.699852	0.941059	1	1	0.000240358	8.77932e-06	k__Bacteria; p__Firmicutes; c__Clostridia; o__Clostridiales; f__Ruminococcaceae; g__Oscillospira; s__
457d3865cf0a4bc602a07d8d5324388f	-0.0616613	0.942058	1	1	0.0021445	0.00222702	k__Bacteria; p__Firmicutes; c__Clostridia; o__Clostridiales; f__Lachnospiraceae; g__; s__
40c85a458df8d5a935122ba778d4f334	-0.0753887	0.948052	1	1	0.016591	0.0177167	k__Bacteria; p__Bacteroidetes; c__Bacteroidia; o__Bacteroidales; f__Bacteroidaceae; g__Bacteroides; s__
c82032c40c98975f71892e4be561c87a	0.0757454	0.948052	1	1	0.00320582	0.0030991	k__Bacteria; p__Firmicutes; c__Clostridia; o__Clostridiales; f__Ruminococcaceae; g__Oscillospira; s__
a678fc12f8ade13c2f9c76d3d5c1cea0	0.0827937	0.949051	1	1	0.00124081	0.00115887	k__Bacteria; p__Firmicutes; c__Clostridia; o__Clostridiales; f__Veillonellaceae; g__Phascolarctobacterium; s__
59597cd430deea6d8e0908dcd6db7e50	0.0553927	0.955045	1	1	0.00672535	0.00649963	k__Bacteria; p__Proteobacteria; c__Betaproteobacteria; o__Burkholderiales; f__Alcaligenaceae; g__Sutterella; s__
f738d6eb5441459c12e96023d56dafcf	-0.0730278	0.957043	1	1	0.000149834	0.000158028	k__Bacteria; p__Firmicutes; c__Clostridia; o__Clostridiales; f__Lachnospiraceae; g__Coprococcus; s__
b153e0852342c0738da791930625716f	-0.0688431	0.958042	1	1	0.000363659	0.000377511	k__Bacteria; p__Firmicutes; c__Erysipelotrichi; o__Erysipelotrichales; f__Erysipelotrichaceae; g__[Eubacterium]; s__biforme
1fa555f9a74d47a6ca7a65a347bc885f	0.038007	0.961039	1	1	0.000866227	0.000839889	k__Bacteria; p__Firmicutes; c__Clostridia; o__Clostridiales; f__Ruminococcaceae; g__Oscillospira; s__
8720f9ecd2331ce68e2896df1bf2d977	0.250268	0.97003	1	1	0.000274695	0.000210704	k__Bacteria; p__Actinobacteria; c__Coriobacteriia; o__Coriobacteriales; f__Coriobacteriaceae; g__Collinsella; s__aerofaciens
3b092a59cd0e2d57483420cc994ec49c	0.0981356	0.974026	1	1	0.00962058	0.008235	k__Bacteria; p__Firmicutes; c__Clostridia; o__Clostridiales; f__Clostridiaceae; g__Clostridium; s__celatum
ad52a0f6646c574417ce0b13b84acfa9	0.0396816	0.977023	1	1	0.000647719	0.000626258	k__Bacteria; p__Firmicutes; c__Clostridia; o__Clostridiales; f__Ruminococcaceae; g__Ruminococcus; s__bromii
c1365ec008032ee718dcafaf5ac17adb	-0.0380408	0.98002	1	1	4.83838e-05	4.97495e-05	k__Bacteria; p__Bacteroidetes; c__Bacteroidia; o__Bacteroidales; f__Rikenellaceae; g__; s__
0189d0173c07f11e7586ff20eb33f5ba	-0.0177584	0.987013	1	1	0.00136879	0.00138421	k__Bacteria; p__Firmicutes; c__Erysipelotrichi; o__Erysipelotrichales; f__Erysipelotrichaceae; g__; s__
95c5af385d373db8539f91a1a3b334a8	-0.0264249	0.992008	1	1	7.49169e-05	7.60875e-05	k__Bacteria; p__Firmicutes; c__Clostridia; o__Clostridiales; f__Ruminococcaceae; g__; s__
2fad39e365933a7f925040cb3c2a5ef8	-0.4529	1	1	1	6.24307e-06	1.17058e-05	k__Bacteria; p__Actinobacteria; c__Coriobacteriia; o__Coriobacteriales; f__Coriobacteriaceae; g__; s__
be17b29b03ed02bed133932284568d16	-0.285318	1	1	1	1.56077e-05	2.34115e-05	k__Bacteria; p__Firmicutes; c__Clostridia; o__Clostridiales; f__Ruminococcaceae
de6891b6f7a1f35bd9ccbc058b9e1a77	0.726454	1	1	1	1.56077e-06	0	k__Bacteria; p__Firmicutes; c__Clostridia; o__Clostridiales; f__Lachnospiraceae
bad4f7c5ada34a1f813946abcfe5c556	0.470557	1	1	1	0.000126422	4.38966e-05	k__Bacteria; p__Firmicutes; c__Clostridia; o__Clostridiales; f__; g__; s__
447b9d6a5c17543a456c597e65b37139	0.0407331	1	1	1	1.24861e-05	1.17058e-05	k__Bacteria; p__Firmicutes; c__Clostridia; o__Clostridiales; f__Lachnospiraceae; g__Coprococcus; s__
8a9f7499cdb85b8efa497bb56256cb43	0.726454	1	1	1	7.80384e-06	0	k__Bacteria; p__Firmicutes; c__Clostridia; o__Clostridiales; f__Lachnospiraceae
a650f349bbdffb95b3624519d1ba72b8	nan	nan	1	nan	0	0	k__Bacteria; p__Firmicutes; c__Bacilli; o__Lactobacillales; f__Streptococcaceae; g__Streptococcus; s__
23e5edb47f5a9a45adc62dc95d595ce6	nan	nan	1	nan	0	0	k__Bacteria; p__Bacteroidetes; c__Bacteroidia; o__Bacteroidales; f__Prevotellaceae; g__Prevotella; s__copri
1986030e3c5cd5df6d869054bc96e536	nan	nan	1	nan	0	0	k__Bacteria; p__Proteobacteria; c__Gammaproteobacteria; o__Pasteurellales; f__Pasteurellaceae; g__Haemophilus; s__parainfluenzae
1527fd8b14037f53b8edb26b111e1f72	nan	nan	1	nan	0	0	k__Bacteria; p__Firmicutes; c__Clostridia; o__Clostridiales; f__Lachnospiraceae; g__; s__
69536042153447ceb692aa53159ce0c2	nan	nan	1	nan	0	0	k__Bacteria; p__Firmicutes; c__Clostridia; o__Clostridiales; f__Lachnospiraceae

## Sheet: (3) donors-HIV-MSW_vs_HIV-MSM
Relative abundance of 16S sequence variants were compared between HIV-negative MSW and HIV-negative MSM donors by nonparametric t-test
Sequence Variant ID	Test-Statistic	P	FDR_P	Bonferroni_P	HIV- MSM mean	HIV- MSW mean	Taxonomy
40c85a458df8d5a935122ba778d4f334	-2.72438	0.000999001	0.014985	0.17982	0.000751633	0.0229433	k__Bacteria; p__Bacteroidetes; c__Bacteroidia; o__Bacteroidales; f__Bacteroidaceae; g__Bacteroides; s__
6a17479edbe461431433bddb084f731e	-2.8258	0.000999001	0.014985	0.17982	0.000268616	0.0045155	k__Bacteria; p__Proteobacteria; c__Betaproteobacteria; o__Burkholderiales; f__Alcaligenaceae; g__Sutterella; s__
2fad39e365933a7f925040cb3c2a5ef8	3.12591	0.000999001	0.014985	0.17982	0.000357334	0	k__Bacteria; p__Actinobacteria; c__Coriobacteriia; o__Coriobacteriales; f__Coriobacteriaceae; g__; s__
f7686a74ca2d3729eb66305e8a26309b	-4.00676	0.000999001	0.014985	0.17982	0.00424611	0.0276812	k__Bacteria; p__Firmicutes; c__Clostridia; o__Clostridiales; f__Lachnospiraceae; g__Coprococcus; s__
d39f37b814ebd81091a949f8bd9d1710	-3.30457	0.000999001	0.014985	0.17982	0.000460837	0.00707321	k__Bacteria; p__Bacteroidetes; c__Bacteroidia; o__Bacteroidales; f__Bacteroidaceae; g__Bacteroides; s__caccae
cc968157f7691aab95df444e8cd103e2	-3.01181	0.000999001	0.014985	0.17982	0.00025383	0.00335955	k__Bacteria; p__Firmicutes; c__Clostridia; o__Clostridiales; f__Clostridiaceae; g__Clostridium; s__
eea6b86c0c75e740670ccc50613b1b23	-4.94879	0.000999001	0.014985	0.17982	0.0125584	0.0436625	k__Bacteria; p__Firmicutes; c__Clostridia; o__Clostridiales; f__Lachnospiraceae; g__Blautia; s__
0f6200a5b77099113b52eea9a8645181	2.95382	0.000999001	0.014985	0.17982	0.0163141	0.000629185	k__Bacteria; p__Firmicutes; c__Erysipelotrichi; o__Erysipelotrichales; f__Erysipelotrichaceae; g__[Eubacterium]; s__biforme
23e5edb47f5a9a45adc62dc95d595ce6	3.48948	0.000999001	0.014985	0.17982	0.0585337	0.00460037	k__Bacteria; p__Bacteroidetes; c__Bacteroidia; o__Bacteroidales; f__Prevotellaceae; g__Prevotella; s__copri
588a23811b3e98af68f4f0fb24a0daa8	-3.61197	0.000999001	0.014985	0.17982	0.001141	0.00763801	k__Bacteria; p__Firmicutes; c__Clostridia; o__Clostridiales; f__Lachnospiraceae; g__Coprococcus; s__
ea2b0e4a93c24c6c3661cbe347f93b74	-3.48742	0.000999001	0.014985	0.17982	0.00432497	0.0335224	k__Bacteria; p__Bacteroidetes; c__Bacteroidia; o__Bacteroidales; f__Bacteroidaceae; g__Bacteroides; s__uniformis
6c7fa77831ae630967a6fbfc8ee47901	-3.91596	0.000999001	0.014985	0.17982	0.00556455	0.0229579	k__Bacteria; p__Firmicutes; c__Clostridia; o__Clostridiales; f__Lachnospiraceae; g__Clostridium; s__clostridioforme
149e7d5e484d157f2ac6140a2111618e	-3.02068	0.001998	0.023976	0.35964	0.00193453	0.00791017	k__Bacteria; p__Firmicutes; c__Clostridia; o__Clostridiales; f__Ruminococcaceae; g__Faecalibacterium; s__prausnitzii
a678fc12f8ade13c2f9c76d3d5c1cea0	2.38239	0.001998	0.023976	0.35964	0.0054709	2.92644e-05	k__Bacteria; p__Firmicutes; c__Clostridia; o__Clostridiales; f__Veillonellaceae; g__Phascolarctobacterium; s__
4faf0d1e462b85e630eaa40b17d8d744	3.18829	0.001998	0.023976	0.35964	0.000138005	0	k__Bacteria; p__Firmicutes; c__Clostridia; o__Clostridiales; f__; g__; s__
0681937d15d01090c93f3fb99998d90c	2.93466	0.002997	0.031733	0.539461	0.00387153	0	k__Bacteria; p__Proteobacteria; c__Deltaproteobacteria; o__Desulfovibrionales; f__Desulfovibrionaceae; g__Desulfovibrio; s__
2a13ecb6c618ddf8154298c69336dd8e	-2.4136	0.002997	0.031733	0.539461	6.90024e-05	0.00105352	k__Bacteria; p__Firmicutes; c__Erysipelotrichi; o__Erysipelotrichales; f__Erysipelotrichaceae; g__Clostridium; s__spiroforme
b153e0852342c0738da791930625716f	2.4374	0.003996	0.035964	0.719281	0.00624225	1.17058e-05	k__Bacteria; p__Firmicutes; c__Erysipelotrichi; o__Erysipelotrichales; f__Erysipelotrichaceae; g__[Eubacterium]; s__biforme
be17b29b03ed02bed133932284568d16	-3.04531	0.003996	0.035964	0.719281	0.000298189	0.00154516	k__Bacteria; p__Firmicutes; c__Clostridia; o__Clostridiales; f__Ruminococcaceae
ad7bc2bb6e1ec90a9bc3c8949bce80d6	-2.80458	0.003996	0.035964	0.719281	0.000150327	0.00133738	k__Bacteria; p__Firmicutes; c__Clostridia; o__Clostridiales; f__Lachnospiraceae; g__[Ruminococcus]; s__gnavus
f9f5f08e8da4cc9740518223846563db	2.13254	0.004995	0.0408682	0.899101	0.000566805	0	k__Bacteria; p__Bacteroidetes; c__Bacteroidia; o__Bacteroidales; f__Rikenellaceae; g__; s__
138daeaeee1211d2a3d8502b8fe23b2a	3.0631	0.004995	0.0408682	0.899101	0.0055128	0.000184366	k__Bacteria; p__Bacteroidetes; c__Bacteroidia; o__Bacteroidales; f__S24-7; g__; s__
1e6fb78e2244ca940f9fc31d88d711dc	2.15834	0.00599401	0.044955	1	0.00158213	0	k__Bacteria; p__Firmicutes; c__Clostridia; o__Clostridiales; f__[Mogibacteriaceae]; g__Mogibacterium; s__
fdb1c35a8dab336d65ed22d796e71e4b	2.63203	0.00599401	0.044955	1	0.000125683	0	k__Bacteria; p__Actinobacteria; c__Coriobacteriia; o__Coriobacteriales; f__Coriobacteriaceae; g__; s__
7ebc04cb539befd9f2e7faa131628c66	2.51518	0.00799201	0.0553293	1	0.000522447	6.43817e-05	k__Bacteria; p__Firmicutes; c__Clostridia; o__Clostridiales; f__[Mogibacteriaceae]; g__; s__
ac5402de1ddf427ab8d2b0a8a0a44f19	-2.56216	0.00799201	0.0553293	1	0.0111981	0.0486872	k__Bacteria; p__Bacteroidetes; c__Bacteroidia; o__Bacteroidales; f__Bacteroidaceae; g__Bacteroides; s__
370829fece3190f1a8efccf50b7d0921	-1.86638	0.00899101	0.0558063	1	0.000145398	0.000927682	k__Bacteria; p__Firmicutes; c__Clostridia; o__Clostridiales; f__Ruminococcaceae; g__Oscillospira; s__
3e93fd55a231bb99b67a666bad8446a8	-2.72274	0.00899101	0.0558063	1	0.000162649	0.000749169	k__Bacteria; p__Firmicutes; c__Clostridia; o__Clostridiales; f__Ruminococcaceae; g__Ruminococcus; s__
59196a586276f0be745d0e334fc071c6	-2.85138	0.00899101	0.0558063	1	0.00430279	0.0101548	k__Bacteria; p__Firmicutes; c__Clostridia; o__Clostridiales; f__Lachnospiraceae; g__Blautia; s__
7ce470a3f833253f6d667fa6830abe07	-2.04787	0.011988	0.0696078	1	5.42162e-05	0.000295571	k__Bacteria; p__Firmicutes; c__Clostridia; o__Clostridiales; f__Lachnospiraceae; g__[Ruminococcus]; s__
4c2189b6b5ced3cb80093414e9449de9	-2.58592	0.011988	0.0696078	1	0.000815707	0.00266599	k__Bacteria; p__Firmicutes; c__Clostridia; o__Clostridiales; f__Ruminococcaceae
877f27b47c85f6b2d3cf8a6aa86def40	2.06492	0.012987	0.0730519	1	0.00404896	0.000579435	k__Bacteria; p__Firmicutes; c__Clostridia; o__Clostridiales; f__Lachnospiraceae; g__; s__
e5a43b018c81cedd19e9a5354d32d469	-1.59741	0.014985	0.0770658	1	9.11817e-05	0.00491642	k__Bacteria; p__Bacteroidetes; c__Bacteroidia; o__Bacteroidales; f__Bacteroidaceae; g__Bacteroides; s__
7b2ff5940de11da4dc3bb208805dff11	-2.49657	0.014985	0.0770658	1	1.72506e-05	0.000122911	k__Bacteria; p__Firmicutes; c__Clostridia; o__Clostridiales; f__Ruminococcaceae; g__Oscillospira; s__
bad4f7c5ada34a1f813946abcfe5c556	-2.51971	0.014985	0.0770658	1	0.00141948	0.00333029	k__Bacteria; p__Firmicutes; c__Clostridia; o__Clostridiales; f__; g__; s__
bd0f4e14387ee1ac7e5fe586cadbbed4	-2.0932	0.015984	0.0799201	1	4.43587e-05	0.00022241	k__Bacteria; p__Firmicutes; c__Clostridia; o__Clostridiales; f__Christensenellaceae; g__; s__
60c57911662a9159dfdd0fc05d975a55	-2.5078	0.016983	0.0826201	1	0.00355609	0.00924463	k__Bacteria; p__Firmicutes; c__Clostridia; o__Clostridiales; f__Ruminococcaceae; g__Gemmiger; s__formicilis
ba88d4e4e6a24ecc2a5aab6bdfbb77f5	2.59693	0.018981	0.0899101	1	0.000428801	0.000102425	k__Bacteria; p__Firmicutes; c__Clostridia; o__Clostridiales; f__Ruminococcaceae; g__Oscillospira; s__
72d6ddeb60679dd2e2844fe039e1a760	1.78304	0.020979	0.0968263	1	0.000241508	0	k__Bacteria; p__Proteobacteria; c__Deltaproteobacteria; o__Desulfovibrionales; f__Desulfovibrionaceae; g__; s__
79280cea51a6fe8a3432b2f266dd34db	-2.19907	0.033966	0.152847	1	0.019885	0.0344091	k__Bacteria; p__Firmicutes; c__Clostridia; o__Clostridiales; f__Ruminococcaceae; g__Faecalibacterium; s__prausnitzii
992072d045462445dc239b35300af2cc	2.05419	0.037962	0.166663	1	0.0670506	0.0161481	k__Bacteria; p__Bacteroidetes; c__Bacteroidia; o__Bacteroidales; f__Prevotellaceae; g__Prevotella; s__copri
217185aee687740c4fa3cc0aa17ee4ff	2.12245	0.038961	0.166976	1	0.0610203	0.0182639	k__Bacteria; p__Firmicutes; c__Erysipelotrichi; o__Erysipelotrichales; f__Erysipelotrichaceae; g__Catenibacterium; s__
39bb3fb5b2257fd2eacca408dc42c5d1	-2.02441	0.042957	0.17982	1	0.00210457	0.00671911	k__Bacteria; p__Firmicutes; c__Clostridia; o__Clostridiales; f__Lachnospiraceae; g__; s__
1fa555f9a74d47a6ca7a65a347bc885f	1.96704	0.043956	0.17982	1	0.00243233	0.000444819	k__Bacteria; p__Firmicutes; c__Clostridia; o__Clostridiales; f__Ruminococcaceae; g__Oscillospira; s__
de6891b6f7a1f35bd9ccbc058b9e1a77	-2.05094	0.045954	0.183729	1	0.000147862	0.00042726	k__Bacteria; p__Firmicutes; c__Clostridia; o__Clostridiales; f__Lachnospiraceae
599ba6458e91e2527f358f547ea39261	-2.08642	0.046953	0.183729	1	0.00388878	0.00731025	k__Bacteria; p__Firmicutes; c__Clostridia; o__Clostridiales; f__Lachnospiraceae; g__Blautia; s__
993ea35e8ad7ff6894e32247dc507e9b	-1.31919	0.0569431	0.217283	1	1.47862e-05	0.000204851	k__Bacteria; p__Firmicutes; c__Clostridia; o__Clostridiales; f__Lachnospiraceae; g__Blautia; s__producta
919db619ad90cc6b09b31c83d5719da9	-1.56559	0.0579421	0.217283	1	0.000120754	0.000509201	k__Bacteria; p__Firmicutes; c__Clostridia; o__Clostridiales; f__Ruminococcaceae; g__Oscillospira; s__
fd1f139259c53276619476db0cc81913	-2.00243	0.0609391	0.222977	1	2.46437e-05	0.000602847	k__Bacteria; p__Firmicutes; c__Clostridia; o__Clostridiales; f__Lachnospiraceae; g__Blautia; s__
447b9d6a5c17543a456c597e65b37139	-1.8864	0.0619381	0.222977	1	0.00420422	0.00925926	k__Bacteria; p__Firmicutes; c__Clostridia; o__Clostridiales; f__Lachnospiraceae; g__Coprococcus; s__
a66dd8d31584930c2b0f811f572dddcf	-1.91558	0.0649351	0.225593	1	0.00514068	0.0116238	k__Bacteria; p__Bacteroidetes; c__Bacteroidia; o__Bacteroidales; f__Porphyromonadaceae; g__Parabacteroides; s__distasonis
010f0ac2691bc0be12d0633d4b5d2cc4	-1.82388	0.0669331	0.225593	1	0.00487946	0.0107517	k__Bacteria; p__Firmicutes; c__Clostridia; o__Clostridiales; f__Ruminococcaceae; g__Faecalibacterium; s__prausnitzii
57e77761c7d4464a3968f059b4a9afcc	1.89087	0.0679321	0.225593	1	0.000207007	1.75586e-05	k__Bacteria; p__Firmicutes; c__Clostridia; o__Clostridiales; f__Ruminococcaceae; g__; s__
959d48a11e3b26c9268f0bd1dae6ec40	-1.87954	0.0689311	0.225593	1	0.00289564	0.00620405	k__Bacteria; p__Firmicutes; c__Clostridia; o__Clostridiales; f__Lachnospiraceae; g__Blautia; s__obeum
f10155af1849a17996f302d71b32398c	1.2406	0.0689311	0.225593	1	0.000739311	0	k__Bacteria; p__Firmicutes; c__Clostridia; o__Clostridiales; f__Lachnospiraceae
8937656c16c20701c107e715bad86732	-1.85234	0.0709291	0.227986	1	0.0189116	0.0365366	k__Bacteria; p__Firmicutes; c__Clostridia; o__Clostridiales; f__Lachnospiraceae; g__Roseburia; s__faecis
f596fa835cdfdb22d6494b012f61fff2	-1.82096	0.0739261	0.233451	1	0.00111882	0.00238212	k__Bacteria; p__Firmicutes; c__Clostridia; o__Clostridiales; f__Lachnospiraceae; g__Blautia; s__
3f1ed51e954b35a8108c12dd882b696b	-1.74239	0.0759241	0.234681	1	0.000485481	0.00153931	k__Bacteria; p__Firmicutes; c__Clostridia; o__Clostridiales; f__Ruminococcaceae; g__Oscillospira; s__
458157e555a80f9ba01d9da37ef787eb	1.84673	0.0769231	0.234681	1	0.00962091	0.00182025	k__Bacteria; p__Firmicutes; c__Clostridia; o__Clostridiales; f__Ruminococcaceae; g__Oscillospira; s__
cae14798faeabb8e1b8840e712839921	-1.81753	0.0829171	0.248751	1	0.000537233	0.00166514	k__Bacteria; p__Bacteroidetes; c__Bacteroidia; o__Bacteroidales; f__Rikenellaceae; g__Alistipes; s__finegoldii
552e00cb506f739acaf08aa5641f9d84	-1.76884	0.0859141	0.253517	1	0.00066538	0.00162417	k__Bacteria; p__Firmicutes; c__Clostridia; o__Clostridiales; f__Lachnospiraceae
d061a99148d649c4eca4836c5f4b5b68	-1.6981	0.0919081	0.26683	1	0.00594653	0.0219425	k__Bacteria; p__Firmicutes; c__Erysipelotrichi; o__Erysipelotrichales; f__Erysipelotrichaceae; g__; s__
0189d0173c07f11e7586ff20eb33f5ba	-1.74794	0.0949051	0.271157	1	9.85749e-06	4.97495e-05	k__Bacteria; p__Firmicutes; c__Erysipelotrichi; o__Erysipelotrichales; f__Erysipelotrichaceae; g__; s__
bda6b6e7da7508c68057140e7bd6cd8d	1.72804	0.0999001	0.280628	1	0.00274285	0.00090427	k__Bacteria; p__Firmicutes; c__Clostridia; o__Clostridiales; f__Ruminococcaceae; g__Oscillospira; s__
96b08b31f324f113c7b260a50f09860c	1.64767	0.102897	0.280628	1	0.000263688	0	k__Bacteria; p__Bacteroidetes; c__Bacteroidia; o__Bacteroidales; f__[Odoribacteraceae]; g__Butyricimonas; s__
4b548f1f6fc22f32237396b7d4ffee6e	-1.74326	0.102897	0.280628	1	6.90024e-05	0.000219483	k__Bacteria; p__Firmicutes; c__Clostridia; o__Clostridiales; f__Ruminococcaceae; g__Oscillospira; s__
9f74473636e6874853d88dfcbcecff49	-1.72147	0.105894	0.284492	1	5.66805e-05	0.000266306	k__Bacteria; p__Firmicutes; c__Bacilli; o__Lactobacillales; f__Streptococcaceae; g__Lactococcus; s__
457d3865cf0a4bc602a07d8d5324388f	-1.61925	0.107892	0.285597	1	8.6253e-05	0.00042726	k__Bacteria; p__Firmicutes; c__Clostridia; o__Clostridiales; f__Lachnospiraceae; g__; s__
d05c86b5bfc092d8677507fb1eae8d66	1.46701	0.114885	0.295419	1	0.00588738	0.000705272	k__Bacteria; p__Firmicutes; c__Clostridia; o__Clostridiales; f__Ruminococcaceae; g__Ruminococcus; s__
8a9f7499cdb85b8efa497bb56256cb43	-1.59107	0.114885	0.295419	1	0.000480552	0.00149541	k__Bacteria; p__Firmicutes; c__Clostridia; o__Clostridiales; f__Lachnospiraceae
059c8f8bb468064b134ea6d3661761ea	-1.63233	0.136863	0.346977	1	0.00133076	0.00409409	k__Bacteria; p__Firmicutes; c__Clostridia; o__Clostridiales; f__Lachnospiraceae; g__Lachnospira; s__
e6a34eb113dba66df0b8bbec907a8f5d	-1.52145	0.141858	0.354645	1	0.00308786	0.0080243	k__Bacteria; p__Bacteroidetes; c__Bacteroidia; o__Bacteroidales; f__Rikenellaceae; g__Alistipes; s__putredinis
95c5af385d373db8539f91a1a3b334a8	-1.47011	0.145854	0.35964	1	4.92874e-06	2.6338e-05	k__Bacteria; p__Firmicutes; c__Clostridia; o__Clostridiales; f__Ruminococcaceae; g__; s__
1aab913302590e21a7be28b1494a3320	-1.63583	0.156843	0.376203	1	2.21793e-05	0.000108278	k__Bacteria; p__Firmicutes; c__Clostridia; o__Clostridiales; f__Ruminococcaceae; g__Oscillospira; s__
d315a0b30c8e21db4cfe89e65c0b2bf1	-1.55649	0.158841	0.376203	1	2.21793e-05	0.00013169	k__Bacteria; p__Firmicutes; c__Clostridia; o__Clostridiales; f__; g__; s__
7c82a2ef7685c5c6dc3080f56033cee9	1.47105	0.158841	0.376203	1	8.13243e-05	2.04851e-05	k__Bacteria; p__Proteobacteria; c__Betaproteobacteria; o__Burkholderiales; f__Oxalobacteraceae; g__Oxalobacter; s__formigenes
c82032c40c98975f71892e4be561c87a	-1.49347	0.162837	0.380126	1	0.000421408	0.00100084	k__Bacteria; p__Firmicutes; c__Clostridia; o__Clostridiales; f__Ruminococcaceae; g__Oscillospira; s__
251429848560a80abcb96640ceb102db	-1.45257	0.166833	0.380126	1	0.000946319	0.00243773	k__Bacteria; p__Firmicutes; c__Clostridia; o__Clostridiales; f__Lachnospiraceae; g__; s__
59597cd430deea6d8e0908dcd6db7e50	1.45004	0.166833	0.380126	1	0.00864501	0.00225921	k__Bacteria; p__Proteobacteria; c__Betaproteobacteria; o__Burkholderiales; f__Alcaligenaceae; g__Sutterella; s__
ca9dec36ad0aa5a1473144ddcb74951d	1.37023	0.171828	0.38406	1	0.00517764	0.00122618	k__Bacteria; p__Firmicutes; c__Clostridia; o__Clostridiales; f__Ruminococcaceae
92f000f936d3f349c5e7719a5edc5078	1.40733	0.172827	0.38406	1	0.000552019	0.000289718	k__Bacteria; p__Firmicutes; c__Clostridia; o__Clostridiales; f__Lachnospiraceae; g__; s__
f738d6eb5441459c12e96023d56dafcf	-1.50693	0.17982	0.394727	1	0	1.75586e-05	k__Bacteria; p__Firmicutes; c__Clostridia; o__Clostridiales; f__Lachnospiraceae; g__Coprococcus; s__
8f1c11c7b732265cbfc1bb7dbd0241e7	-1.34975	0.185814	0.402971	1	0.000968498	0.00184073	k__Bacteria; p__Firmicutes; c__Clostridia; o__Clostridiales; f__Lachnospiraceae; g__; s__
b2ab597a902ff227a5ba76030cd6002e	-1.59974	0.192807	0.407732	1	0	5.85288e-06	k__Bacteria; p__Firmicutes; c__Clostridia; o__Clostridiales; f__Ruminococcaceae
9099a7f671b923c7b07c12508f17270a	-1.34745	0.193806	0.407732	1	0.000211936	0.000456525	k__Bacteria; p__Firmicutes; c__Clostridia; o__Clostridiales; f__Ruminococcaceae; g__Ruminococcus; s__
04c8be5a3a6ba2d70446812e99318905	-1.48208	0.194805	0.407732	1	0.00248162	0.00585288	k__Bacteria; p__Bacteroidetes; c__Bacteroidia; o__Bacteroidales; f__Bacteroidaceae; g__Bacteroides
40a6b537d995aeb12b0100e2cb6ad879	-1.26984	0.237762	0.491922	1	0.000128147	0.000245821	k__Bacteria; p__Firmicutes; c__Clostridia; o__Clostridiales; f__Lachnospiraceae; g__Blautia; s__
3233034b11dfc584717d9264882a4fce	-1.30614	0.246753	0.503092	1	3.45012e-05	0.000108278	k__Bacteria; p__Firmicutes; c__Clostridia; o__Clostridiales; f__Ruminococcaceae
bfb7bb16ab570748b3a5d099e9426af1	-1.26904	0.248751	0.503092	1	7.39311e-05	0.000196072	k__Bacteria; p__Firmicutes; c__Clostridia; o__Clostridiales; f__Ruminococcaceae; g__; s__
6a129e8ae637c96e7bb56223913911f7	-1.2003	0.257742	0.515485	1	0.000443587	0.00110034	k__Bacteria; p__Firmicutes; c__Clostridia; o__Clostridiales; f__Lachnospiraceae; g__Coprococcus; s__
0d3b942348cade7e1c41ac52df03e63e	1.16856	0.260739	0.515748	1	0.000793528	0.000187292	k__Bacteria; p__Firmicutes; c__Clostridia; o__Clostridiales; f__Veillonellaceae; g__Dialister; s__
c5af8314e36eaed98fc88f181f539e8f	1.17476	0.277722	0.541394	1	0.00086253	0.000474083	k__Bacteria; p__Firmicutes; c__Clostridia; o__Clostridiales; f__Lachnospiraceae; g__Blautia
8ce931b0c99ad5ed648c25483c1ca492	-1.14702	0.27972	0.541394	1	0.000113361	0.00026338	k__Bacteria; p__Firmicutes; c__Erysipelotrichi; o__Erysipelotrichales; f__Erysipelotrichaceae; g__Clostridium; s__ramosum
ee02d6d3506da57909d5e603709a295f	1.04694	0.294705	0.564329	1	0.000943854	0.000614553	k__Bacteria; p__Firmicutes; c__Clostridia; o__Clostridiales; f__Lachnospiraceae; g__; s__
c162a4f3943238810eba8a25f0563cca	-1.10357	0.300699	0.569746	1	0.0107077	0.0204149	k__Bacteria; p__Bacteroidetes; c__Bacteroidia; o__Bacteroidales; f__Bacteroidaceae; g__Bacteroides
3128e057b1d4f320961e4da677724613	-1.23019	0.310689	0.582542	1	1.9715e-05	8.77932e-05	k__Bacteria; p__Firmicutes; c__Clostridia; o__Clostridiales; f__Lachnospiraceae; g__Clostridium; s__symbiosum
340a5698fe78713b785c3bcce89df73b	1.15088	0.323676	0.595768	1	0.00170042	0.000207777	k__Bacteria; p__Bacteroidetes; c__Bacteroidia; o__Bacteroidales; f__Rikenellaceae; g__; s__
1986030e3c5cd5df6d869054bc96e536	1.12576	0.324675	0.595768	1	0.0013283	0.000497495	k__Bacteria; p__Proteobacteria; c__Gammaproteobacteria; o__Pasteurellales; f__Pasteurellaceae; g__Haemophilus; s__parainfluenzae
e82ab12c51a893c6d7938a16632199a8	1.01009	0.327672	0.595768	1	0.000559412	0.000242895	k__Bacteria; p__Firmicutes; c__Clostridia; o__Clostridiales; f__Lachnospiraceae
2ae8a432208b85a14e86eb821c86ce2b	-1.00822	0.33966	0.611389	1	0.00442108	0.00715222	k__Bacteria; p__Firmicutes; c__Clostridia; o__Clostridiales
686d42b9552375c3b61301ae5605e3a2	-1.00025	0.355644	0.633822	1	0.000566805	0.000924755	k__Bacteria; p__Firmicutes; c__Clostridia; o__Clostridiales; f__Lachnospiraceae; g__Roseburia; s__
77ad88eed91eef009bf64f101c96baa6	-0.98105	0.361638	0.638185	1	0.00169795	0.00324835	k__Bacteria; p__Firmicutes; c__Clostridia; o__Clostridiales; f__Lachnospiraceae; g__Roseburia; s__
a650f349bbdffb95b3624519d1ba72b8	-1.00483	0.367632	0.642464	1	0.0016117	0.0030435	k__Bacteria; p__Firmicutes; c__Bacilli; o__Lactobacillales; f__Streptococcaceae; g__Streptococcus; s__
e2c3ff4f647112723741aa72087f1bfa	-1.10502	0.384615	0.659341	1	0.00499528	0.0115477	k__Bacteria; p__Actinobacteria; c__Actinobacteria; o__Bifidobacteriales; f__Bifidobacteriaceae; g__Bifidobacterium
30207d209491dfb7de83344e77fd6fbd	1.06263	0.384615	0.659341	1	0.00377049	0.00160954	k__Bacteria; p__Firmicutes; c__Clostridia; o__Clostridiales; f__; g__; s__
69536042153447ceb692aa53159ce0c2	0.834356	0.425574	0.722674	1	0.000714668	0.000497495	k__Bacteria; p__Firmicutes; c__Clostridia; o__Clostridiales; f__Lachnospiraceae
8a261f382a739bbc5f9494b2c64c2744	-0.813927	0.441558	0.72559	1	0.00242987	0.00350002	k__Bacteria; p__Firmicutes; c__Clostridia; o__Clostridiales; f__Lachnospiraceae; g__Coprococcus; s__
1527fd8b14037f53b8edb26b111e1f72	-0.848112	0.442557	0.72559	1	0.00138005	0.00222702	k__Bacteria; p__Firmicutes; c__Clostridia; o__Clostridiales; f__Lachnospiraceae; g__; s__
0f92fcc184a951ff8b0914467ad2f8f9	-0.875153	0.442557	0.72559	1	0.000904424	0.00159198	k__Bacteria; p__Proteobacteria; c__Deltaproteobacteria; o__Desulfovibrionales; f__Desulfovibrionaceae; g__Bilophila; s__
8720f9ecd2331ce68e2896df1bf2d977	-0.795371	0.445554	0.72559	1	0.002075	0.00285621	k__Bacteria; p__Actinobacteria; c__Coriobacteriia; o__Coriobacteriales; f__Coriobacteriaceae; g__Collinsella; s__aerofaciens
9f4d14b114e7499772a797790d81c1db	-0.818215	0.452547	0.72559	1	0.00129872	0.00181147	k__Bacteria; p__Firmicutes; c__Clostridia; o__Clostridiales; f__Lachnospiraceae; g__Coprococcus; s__catus
90c2b51afe404951ec89bd52c7ae1f58	-0.955876	0.458541	0.72559	1	1.23219e-05	4.09702e-05	k__Bacteria; p__Firmicutes; c__Clostridia; o__Clostridiales; f__Lachnospiraceae; g__Dorea; s__
2c1dcc76478dfbb19fa59690738202c6	-1.01485	0.458541	0.72559	1	7.39311e-06	0.000108278	k__Bacteria; p__Firmicutes; c__Clostridia; o__Clostridiales; f__Lachnospiraceae; g__[Ruminococcus]; s__gnavus
a6099802840e60febef8e896967b7747	0.773039	0.45954	0.72559	1	0.000532304	0.000365805	k__Bacteria; p__Firmicutes; c__Clostridia; o__Clostridiales; f__[Mogibacteriaceae]; g__; s__
2b982979f2401a8bc447d7141879e9b2	-0.785896	0.464535	0.727099	1	0.00878056	0.0112931	k__Bacteria; p__Firmicutes; c__Clostridia; o__Clostridiales; f__Lachnospiraceae
74ec9fe6ffab4ecff6d5def74298a825	-0.784141	0.490509	0.756167	1	0.000101039	0.000225336	k__Bacteria; p__Firmicutes; c__Clostridia; o__Clostridiales; f__Lachnospiraceae; g__Clostridium
6c4de756c45fa6e7e5adfe196f9f0039	0.71629	0.491508	0.756167	1	0.0025802	0.00172075	k__Bacteria; p__Firmicutes; c__Clostridia; o__Clostridiales; f__Lachnospiraceae; g__Coprococcus; s__
9dc78fd8f2f7cb10e190e77af61c7ecd	-0.712385	0.4995	0.761591	1	0.000120754	0.00017266	k__Bacteria; p__Firmicutes; c__Clostridia; o__Clostridiales; f__Lachnospiraceae
c4f9ef34bd2919511069f409c25de6f1	-0.949667	0.503497	0.761591	1	0.00483017	0.0131661	k__Bacteria; p__Bacteroidetes; c__Bacteroidia; o__Bacteroidales; f__Bacteroidaceae; g__Bacteroides; s__
5860dac317300b1fe6094e958240cc7f	0.647724	0.521479	0.777239	1	0.000280938	0.000207777	k__Bacteria; p__Firmicutes; c__Clostridia; o__Clostridiales; f__Lachnospiraceae; g__Coprococcus; s__
3b092a59cd0e2d57483420cc994ec49c	-0.980705	0.522478	0.777239	1	0.0015772	0.00858618	k__Bacteria; p__Firmicutes; c__Clostridia; o__Clostridiales; f__Clostridiaceae; g__Clostridium; s__celatum
c5b4c6b372dbc13b6a7f2d466fc7335f	-0.756443	0.531469	0.782145	1	3.94299e-05	0.000122911	k__Bacteria; p__Firmicutes; c__Clostridia; o__Clostridiales; f__Lachnospiraceae
1ef782a559e3e0a4ab42516e0a2c828f	-0.79474	0.534466	0.782145	1	0.000115825	0.000359952	k__Bacteria; p__Firmicutes; c__Clostridia; o__Clostridiales; f__Lachnospiraceae; g__; s__
8bb5ff097e0707dca3fe5860af20f4a6	0.66891	0.541459	0.785988	1	0.00229433	0.00159198	k__Bacteria; p__Bacteroidetes; c__Bacteroidia; o__Bacteroidales; f__Rikenellaceae; g__; s__
10155b2834300619ce0102110a37b057	-0.61976	0.55045	0.792647	1	0.000342548	0.000453598	k__Bacteria; p__Firmicutes; c__Clostridia; o__Clostridiales; f__Lachnospiraceae; g__; s__
04195686f2b70585790ec75320de0d6f	0.60953	0.559441	0.799201	1	0.00523432	0.00272159	k__Bacteria; p__Proteobacteria; c__Gammaproteobacteria; o__Enterobacteriales; f__Enterobacteriaceae
2ab8310e1e510f8045c7f4d191fa36be	0.83257	0.576424	0.812676	1	0.000800921	0.000377511	k__Bacteria; p__Firmicutes; c__Clostridia; o__Clostridiales; f__Lachnospiraceae; g__; s__
2319f9fecaef59a51537cdcb69cf5615	0.778198	0.579421	0.812676	1	6.16093e-05	2.92644e-05	k__Bacteria; p__Firmicutes; c__Clostridia; o__Clostridiales; f__Ruminococcaceae
fea3411c847e6627afb5e78b88e2e9af	-0.608955	0.582418	0.812676	1	0.000988213	0.00165637	k__Bacteria; p__Firmicutes; c__Clostridia; o__Clostridiales; f__Lachnospiraceae; g__[Ruminococcus]; s__torques
a3607a88a8ed64e24a374847b23e404f	-0.353688	0.606394	0.839622	1	0.00275763	0.00366683	k__Bacteria; p__Firmicutes; c__Clostridia; o__Clostridiales; f__Ruminococcaceae; g__Ruminococcus; s__
f45b62ab6ec22fb20364a7e05088158f	0.483996	0.613387	0.842821	1	0.00027601	0.000201924	k__Bacteria; p__Firmicutes; c__Clostridia; o__Clostridiales; f__Lachnospiraceae
539ca948741b9a713eb781d4281b23fc	0.752655	0.624376	0.848107	1	0.00011829	4.68231e-05	k__Bacteria; p__Firmicutes; c__Clostridia; o__Clostridiales; f__Ruminococcaceae; g__Anaerotruncus; s__
c1365ec008032ee718dcafaf5ac17adb	0.497898	0.628372	0.848107	1	0.000766419	0.000564803	k__Bacteria; p__Bacteroidetes; c__Bacteroidia; o__Bacteroidales; f__Rikenellaceae; g__; s__
8a83cfd5eb074b5dbc6118eb03ef915e	-0.914477	0.631369	0.848107	1	0.000611164	0.00221824	k__Bacteria; p__Bacteroidetes; c__Bacteroidia; o__Bacteroidales; f__[Odoribacteraceae]; g__Butyricimonas; s__
ea3433f2c148c6fae4cc2e9ae197f5b8	0.4867	0.642358	0.856477	1	0.00990431	0.00632111	k__Bacteria; p__Firmicutes; c__Clostridia; o__Clostridiales; f__Peptostreptococcaceae
180b74e94caf35fac5e1f0f4b7ad9d9f	0.676464	0.653347	0.864724	1	0.00199861	0.0011735	k__Bacteria; p__Bacteroidetes; c__Bacteroidia; o__Bacteroidales; f__[Odoribacteraceae]; g__Odoribacter; s__
46d8ab5615f60d7b522f3590976668be	0.487018	0.659341	0.866287	1	7.63955e-05	4.97495e-05	k__Bacteria; p__Firmicutes; c__Clostridia; o__Clostridiales; f__; g__; s__
7e17a5137fd9dab8c02617a186088c4d	-0.339837	0.67033	0.869769	1	8.87174e-05	0.000122911	k__Bacteria; p__Firmicutes; c__Clostridia; o__Clostridiales; f__Ruminococcaceae; g__; s__
6bbaf2d026d54c61f24b5c5483e56842	-0.359268	0.677323	0.869769	1	0.00149834	0.00206607	k__Bacteria; p__Bacteroidetes; c__Bacteroidia; o__Bacteroidales; f__Porphyromonadaceae; g__Parabacteroides; s__distasonis
ada85ea79666bce780693d3893d349cd	0.433125	0.678322	0.869769	1	0.000189757	0.000143396	k__Bacteria; p__Firmicutes; c__Clostridia; o__Clostridiales; f__Ruminococcaceae; g__; s__
a24dae6b87885a55d81df1ea6d1abaf5	-0.430786	0.681319	0.869769	1	0.000961105	0.00122911	k__Bacteria; p__Firmicutes; c__Clostridia; o__Clostridiales; f__Lachnospiraceae; g__; s__
a167e4d4418792dcaba877443ed0e66d	-0.324422	0.703297	0.891503	1	0.000160184	0.000245821	k__Bacteria; p__Bacteroidetes; c__Bacteroidia; o__Bacteroidales; f__[Odoribacteraceae]; g__Butyricimonas; s__
0cc2420a6a4698f8bf664d50b17d26b4	-0.410405	0.712288	0.894106	1	0.00382717	0.00530271	k__Bacteria; p__Bacteroidetes; c__Bacteroidia; o__Bacteroidales; f__Rikenellaceae; g__Alistipes; s__onderdonkii
436497b0e3edb384200f5b9b82883182	0.525193	0.715285	0.894106	1	6.40737e-05	3.51173e-05	k__Bacteria; p__Firmicutes; c__Clostridia; o__Clostridiales; f__Ruminococcaceae; g__; s__
3d766867c97f511431bf97e059d6498f	-0.390497	0.72028	0.89414	1	0.00723293	0.0088759	k__Bacteria; p__Bacteroidetes; c__Bacteroidia; o__Bacteroidales; f__Porphyromonadaceae; g__Parabacteroides; s__
b1f2146bef78066448576fceeb6b644b	0.342272	0.729271	0.899101	1	0.00442601	0.00395947	k__Bacteria; p__Firmicutes; c__Clostridia; o__Clostridiales; f__Lachnospiraceae; g__[Ruminococcus]; s__
363c1c39d58bce4fc3218659d0944258	-0.312695	0.749251	0.913681	1	0.00139237	0.00162125	k__Bacteria; p__Firmicutes; c__Clostridia; o__Clostridiales; f__Lachnospiraceae
904ad13c7b8512200836d5cd9fb09e1b	-0.383719	0.751249	0.913681	1	0.00013554	0.000184366	k__Bacteria; p__Bacteroidetes; c__Bacteroidia; o__Bacteroidales; f__Rikenellaceae; g__Alistipes; s__indistinctus
51a63d18809e04591820c7e3f3acf0b4	-0.460954	0.77023	0.930479	1	3.20368e-05	4.97495e-05	k__Bacteria; p__Firmicutes; c__Clostridia; o__Clostridiales; f__Ruminococcaceae; g__; s__
4c731267e801c2afe253b5cbb58bdd24	-0.259546	0.803197	0.957069	1	0.00405636	0.00441015	k__Bacteria; p__Firmicutes; c__Clostridia; o__Clostridiales; f__Lachnospiraceae; g__Dorea; s__
3f55a8ca784ae7190790023a30cd859c	0.197636	0.808192	0.957069	1	8.37886e-05	6.73081e-05	k__Bacteria; p__Bacteroidetes; c__Bacteroidia; o__Bacteroidales; f__Porphyromonadaceae; g__Parabacteroides; s__gordonii
32382a0f5831da5faee464d011b5616c	-0.412185	0.808192	0.957069	1	0.00170288	0.00249333	k__Bacteria; p__Firmicutes; c__Clostridia; o__Clostridiales; f__Lachnospiraceae; g__Lachnobacterium; s__
89aabf43d24dd5bd0fd0f5aca189d341	-0.19821	0.834166	0.976005	1	0.00283896	0.00306398	k__Bacteria; p__Firmicutes; c__Clostridia; o__Clostridiales; f__Lachnospiraceae; g__Dorea; s__formicigenerans
1a389bf765c8ff0f92600f684fbe7ad7	-0.227934	0.835165	0.976005	1	0.00441862	0.0050803	k__Bacteria; p__Firmicutes; c__Clostridia; o__Clostridiales; f__Ruminococcaceae; g__Faecalibacterium; s__prausnitzii
74923f4bbde849e27fc4eda25d757e2a	0.472391	0.848152	0.976005	1	0.000105968	6.73081e-05	k__Bacteria; p__Firmicutes; c__Erysipelotrichi; o__Erysipelotrichales; f__Erysipelotrichaceae; g__[Eubacterium]; s__dolichum
10cd502b01abafc87e2ecbad86389286	-0.206042	0.855145	0.976005	1	0.00229187	0.00249333	k__Bacteria; p__Firmicutes; c__Clostridia; o__Clostridiales; f__Lachnospiraceae; g__; s__
7201d53bd647437ec3de879774eba498	0.18927	0.857143	0.976005	1	0.000150327	0.00013169	k__Bacteria; p__Actinobacteria; c__Coriobacteriia; o__Coriobacteriales; f__Coriobacteriaceae; g__Slackia; s__
03569e3fd843f501355f7853b0ec9361	0.189315	0.86014	0.976005	1	0.00062595	0.000523833	k__Bacteria; p__Proteobacteria; c__Betaproteobacteria; o__Burkholderiales; f__Alcaligenaceae; g__Sutterella; s__
32a21601ca89d1f2629c1a9fc2de4359	-0.318428	0.862138	0.976005	1	0.000263688	0.000351173	k__Bacteria; p__Bacteroidetes; c__Bacteroidia; o__Bacteroidales; f__[Paraprevotellaceae]; g__Paraprevotella; s__
4be97abf1ab678a8322783fab899c3a4	-0.378461	0.887113	0.990666	1	1.9715e-05	3.21909e-05	k__Bacteria; p__Firmicutes; c__Clostridia; o__Clostridiales; f__Ruminococcaceae; g__Anaerofilum; s__
0c70bdd5631104dd3d818561c9166f6c	0.300126	0.896104	0.990666	1	5.91449e-05	4.09702e-05	k__Bacteria; p__Firmicutes; c__Clostridia; o__Clostridiales; f__Lachnospiraceae; g__Clostridium; s__lavalense
b0645cbec7653c887cb868a248d95874	-0.141825	0.896104	0.990666	1	0.0134259	0.0139064	k__Bacteria; p__Firmicutes; c__Clostridia; o__Clostridiales; f__Ruminococcaceae; g__Faecalibacterium; s__prausnitzii
f12011ad5219b22b6ca790103333a755	0.285108	0.897103	0.990666	1	5.17518e-05	3.80437e-05	k__Bacteria; p__Firmicutes; c__Clostridia; o__Clostridiales; f__Ruminococcaceae; g__Oscillospira; s__
86deb5cf8d6f29d383136e0d09863b69	-0.119323	0.907093	0.99559	1	0.000182363	0.000198998	k__Bacteria; p__Firmicutes; c__Erysipelotrichi; o__Erysipelotrichales; f__Erysipelotrichaceae; g__Holdemania; s__
4311a44a7d56ce4086afad3e75bedd6e	0.330439	0.938062	1	1	0.000581592	0.00043604	k__Bacteria; p__Firmicutes; c__Clostridia; o__Clostridiales; f__Ruminococcaceae
0b05a2e48cdc5f9e766bb0f4c209d4b4	0.0455125	0.958042	1	1	9.11817e-05	8.77932e-05	k__Bacteria; p__Firmicutes; c__Clostridia; o__Clostridiales; f__Ruminococcaceae; g__Oscillospira; s__
61795ee8e60f4a0f66080ab812573fb8	-0.0457738	0.961039	1	1	2.21793e-05	2.34115e-05	k__Bacteria; p__Firmicutes; c__Clostridia; o__Clostridiales; f__Lachnospiraceae
2403a466dd6d1e4f551d80394c2aa994	-0.0449492	0.972028	1	1	0.000924139	0.000971578	k__Bacteria; p__Bacteroidetes; c__Bacteroidia; o__Bacteroidales; f__[Paraprevotellaceae]; g__Paraprevotella; s__
b955f67a541a149dd3b179dc62d37a72	0.014443	0.99001	1	1	0.000239044	0.000237042	k__Bacteria; p__Firmicutes; c__Clostridia; o__Clostridiales; f__[Mogibacteriaceae]; g__; s__
ad52a0f6646c574417ce0b13b84acfa9	-0.0142896	0.991009	1	1	0.0105204	0.0106347	k__Bacteria; p__Firmicutes; c__Clostridia; o__Clostridiales; f__Ruminococcaceae; g__Ruminococcus; s__bromii
c942f59feffce9c3ab527135de234101	0.011353	0.994006	1	1	0.00528608	0.00526174	k__Bacteria; p__Firmicutes; c__Clostridia; o__Clostridiales; f__Lachnospiraceae; g__Roseburia; s__inulinivorans
25def15fb42bed6855ede4893d27a21d	0.00488758	0.994006	1	1	0.0170781	0.0169704	k__Bacteria; p__Verrucomicrobia; c__Verrucomicrobiae; o__Verrucomicrobiales; f__Verrucomicrobiaceae; g__Akkermansia; s__muciniphila
41239266f2952a56a313fc4798f28a1c	-0.00579361	0.995005	1	1	0.000815707	0.000819403	k__Bacteria; p__Firmicutes; c__Clostridia; o__Clostridiales; f__; g__; s__
2a99ec1157a90661db7ff643b82f1914	0.315436	0.997003	1	1	0.00681399	0.00447745	k__Bacteria; p__Bacteroidetes; c__Bacteroidia; o__Bacteroidales; f__Bacteroidaceae; g__Bacteroides; s__fragilis
82c890da8759fa9477cd991a1f214b3c	0.810883	1	1	1	0.000105968	1.17058e-05	k__Bacteria; p__Firmicutes; c__Clostridia; o__Clostridiales; f__Ruminococcaceae; g__Oscillospira; s__
1ad289cd8f44e109fd95de0382c5b252	0.290984	1	1	1	3.20368e-05	2.04851e-05	k__Bacteria; p__Firmicutes; c__Clostridia; o__Clostridiales; f__Lachnospiraceae; g__Clostridium; s__hathewayi
48d9883fd871b82d9bbc89cb0447be8c	0.0553098	1	1	1	2.21793e-05	2.04851e-05	k__Bacteria; p__Firmicutes; c__Clostridia; o__Clostridiales; f__Lachnospiraceae; g__Clostridium; s__aldenense
d6bb5703483ac68992e09ce17683c52f	0.915475	1	1	1	4.92874e-06	0	k__Bacteria; p__Firmicutes; c__Clostridia; o__Clostridiales; f__Ruminococcaceae; g__; s__
34cddd9fe152c24d78924ef25927d67c	nan	nan	1	nan	0	0	k__Bacteria; p__Firmicutes; c__Clostridia; o__Clostridiales; f__Lachnospiraceae; g__Clostridium; s__hathewayi
113ce005a880987438bdbe19ee22add8	nan	nan	1	nan	0	0	k__Bacteria; p__Firmicutes; c__Bacilli; o__Turicibacterales; f__Turicibacteraceae; g__Turicibacter; s__

## Sheet: (4) donors-HIV-MSM_vs_HIV+MSM
Relative abundance of 16S sequence variants were compared between HIV-negative MSM and HIV-positive MSM donors by nonparametric t-test
Sequence Variant ID	Test-Statistic	P	FDR_P	Bonferroni_P	HIV- MSM mean	HIV+ MSM mean	Taxonomy
ad7bc2bb6e1ec90a9bc3c8949bce80d6	-2.08316	0.012987	0.919081	1	0.000150327	0.0028406	k__Bacteria; p__Firmicutes; c__Clostridia; o__Clostridiales; f__Lachnospiraceae; g__[Ruminococcus]; s__gnavus
6c4de756c45fa6e7e5adfe196f9f0039	2.51914	0.013986	0.919081	1	0.0025802	0.000206802	k__Bacteria; p__Firmicutes; c__Clostridia; o__Clostridiales; f__Lachnospiraceae; g__Coprococcus; s__
919db619ad90cc6b09b31c83d5719da9	-2.06869	0.016983	0.919081	1	0.000120754	0.000663327	k__Bacteria; p__Firmicutes; c__Clostridia; o__Clostridiales; f__Ruminococcaceae; g__Oscillospira; s__
34cddd9fe152c24d78924ef25927d67c	-1.70222	0.023976	0.919081	1	0	0.000179488	k__Bacteria; p__Firmicutes; c__Clostridia; o__Clostridiales; f__Lachnospiraceae; g__Clostridium; s__hathewayi
eea6b86c0c75e740670ccc50613b1b23	-1.72243	0.034965	0.919081	1	0.0125584	0.0411067	k__Bacteria; p__Firmicutes; c__Clostridia; o__Clostridiales; f__Lachnospiraceae; g__Blautia; s__
b1f2146bef78066448576fceeb6b644b	-2.18554	0.034965	0.919081	1	0.00442601	0.00917732	k__Bacteria; p__Firmicutes; c__Clostridia; o__Clostridiales; f__Lachnospiraceae; g__[Ruminococcus]; s__
ac5402de1ddf427ab8d2b0a8a0a44f19	-2.02002	0.03996	0.919081	1	0.0111981	0.0437991	k__Bacteria; p__Bacteroidetes; c__Bacteroidia; o__Bacteroidales; f__Bacteroidaceae; g__Bacteroides; s__
40c85a458df8d5a935122ba778d4f334	-1.87443	0.040959	0.919081	1	0.000751633	0.017305	k__Bacteria; p__Bacteroidetes; c__Bacteroidia; o__Bacteroidales; f__Bacteroidaceae; g__Bacteroides; s__
95c5af385d373db8539f91a1a3b334a8	-2.06068	0.045954	0.919081	1	4.92874e-06	7.80384e-05	k__Bacteria; p__Firmicutes; c__Clostridia; o__Clostridiales; f__Ruminococcaceae; g__; s__
ee02d6d3506da57909d5e603709a295f	1.99637	0.0519481	0.931795	1	0.000943854	0.000374584	k__Bacteria; p__Firmicutes; c__Clostridia; o__Clostridiales; f__Lachnospiraceae; g__; s__
fd1f139259c53276619476db0cc81913	-1.89796	0.0569431	0.931795	1	2.46437e-05	0.0010184	k__Bacteria; p__Firmicutes; c__Clostridia; o__Clostridiales; f__Lachnospiraceae; g__Blautia; s__
2c1dcc76478dfbb19fa59690738202c6	-1.75306	0.0729271	1	1	7.39311e-06	5.85288e-05	k__Bacteria; p__Firmicutes; c__Clostridia; o__Clostridiales; f__Lachnospiraceae; g__[Ruminococcus]; s__gnavus
4faf0d1e462b85e630eaa40b17d8d744	1.8631	0.0739261	1	1	0.000138005	3.90192e-05	k__Bacteria; p__Firmicutes; c__Clostridia; o__Clostridiales; f__; g__; s__
9099a7f671b923c7b07c12508f17270a	-1.5104	0.0849151	1	1	0.000211936	0.00149053	k__Bacteria; p__Firmicutes; c__Clostridia; o__Clostridiales; f__Ruminococcaceae; g__Ruminococcus; s__
1fa555f9a74d47a6ca7a65a347bc885f	1.65054	0.0959041	1	1	0.00243233	0.000511152	k__Bacteria; p__Firmicutes; c__Clostridia; o__Clostridiales; f__Ruminococcaceae; g__Oscillospira; s__
4b548f1f6fc22f32237396b7d4ffee6e	-1.44144	0.107892	1	1	6.90024e-05	0.000347271	k__Bacteria; p__Firmicutes; c__Clostridia; o__Clostridiales; f__Ruminococcaceae; g__Oscillospira; s__
f7686a74ca2d3729eb66305e8a26309b	-1.616	0.110889	1	1	0.00424611	0.00709759	k__Bacteria; p__Firmicutes; c__Clostridia; o__Clostridiales; f__Lachnospiraceae; g__Coprococcus; s__
bda6b6e7da7508c68057140e7bd6cd8d	1.46216	0.127872	1	1	0.00274285	0.000959873	k__Bacteria; p__Firmicutes; c__Clostridia; o__Clostridiales; f__Ruminococcaceae; g__Oscillospira; s__
8bb5ff097e0707dca3fe5860af20f4a6	1.44729	0.142857	1	1	0.00229433	0.000686738	k__Bacteria; p__Bacteroidetes; c__Bacteroidia; o__Bacteroidales; f__Rikenellaceae; g__; s__
552e00cb506f739acaf08aa5641f9d84	1.36737	0.145854	1	1	0.00066538	5.0725e-05	k__Bacteria; p__Firmicutes; c__Clostridia; o__Clostridiales; f__Lachnospiraceae
bd0f4e14387ee1ac7e5fe586cadbbed4	-1.49627	0.15984	1	1	4.43587e-05	0.000124861	k__Bacteria; p__Firmicutes; c__Clostridia; o__Clostridiales; f__Christensenellaceae; g__; s__
149e7d5e484d157f2ac6140a2111618e	1.4261	0.163836	1	1	0.00193453	0.000596994	k__Bacteria; p__Firmicutes; c__Clostridia; o__Clostridiales; f__Ruminococcaceae; g__Faecalibacterium; s__prausnitzii
c5af8314e36eaed98fc88f181f539e8f	1.3433	0.16983	1	1	0.00086253	0.000374584	k__Bacteria; p__Firmicutes; c__Clostridia; o__Clostridiales; f__Lachnospiraceae; g__Blautia
74ec9fe6ffab4ecff6d5def74298a825	-1.55504	0.170829	1	1	0.000101039	0.000440917	k__Bacteria; p__Firmicutes; c__Clostridia; o__Clostridiales; f__Lachnospiraceae; g__Clostridium
39bb3fb5b2257fd2eacca408dc42c5d1	-1.44784	0.171828	1	1	0.00210457	0.00451062	k__Bacteria; p__Firmicutes; c__Clostridia; o__Clostridiales; f__Lachnospiraceae; g__; s__
c1365ec008032ee718dcafaf5ac17adb	1.3194	0.196803	1	1	0.000766419	0.000167783	k__Bacteria; p__Bacteroidetes; c__Bacteroidia; o__Bacteroidales; f__Rikenellaceae; g__; s__
86deb5cf8d6f29d383136e0d09863b69	1.26058	0.204795	1	1	0.000182363	1.56077e-05	k__Bacteria; p__Firmicutes; c__Erysipelotrichi; o__Erysipelotrichales; f__Erysipelotrichaceae; g__Holdemania; s__
370829fece3190f1a8efccf50b7d0921	-1.26712	0.210789	1	1	0.000145398	0.000495544	k__Bacteria; p__Firmicutes; c__Clostridia; o__Clostridiales; f__Ruminococcaceae; g__Oscillospira; s__
2a13ecb6c618ddf8154298c69336dd8e	-1.25978	0.210789	1	1	6.90024e-05	0.000585288	k__Bacteria; p__Firmicutes; c__Erysipelotrichi; o__Erysipelotrichales; f__Erysipelotrichaceae; g__Clostridium; s__spiroforme
458157e555a80f9ba01d9da37ef787eb	1.29359	0.218781	1	1	0.00962091	0.00337906	k__Bacteria; p__Firmicutes; c__Clostridia; o__Clostridiales; f__Ruminococcaceae; g__Oscillospira; s__
cc968157f7691aab95df444e8cd103e2	-1.20014	0.221778	1	1	0.00025383	0.00103011	k__Bacteria; p__Firmicutes; c__Clostridia; o__Clostridiales; f__Clostridiaceae; g__Clostridium; s__
a66dd8d31584930c2b0f811f572dddcf	-1.21252	0.228771	1	1	0.00514068	0.0107342	k__Bacteria; p__Bacteroidetes; c__Bacteroidia; o__Bacteroidales; f__Porphyromonadaceae; g__Parabacteroides; s__distasonis
be17b29b03ed02bed133932284568d16	-1.19402	0.22977	1	1	0.000298189	0.000596994	k__Bacteria; p__Firmicutes; c__Clostridia; o__Clostridiales; f__Ruminococcaceae
599ba6458e91e2527f358f547ea39261	1.21565	0.231768	1	1	0.00388878	0.00230604	k__Bacteria; p__Firmicutes; c__Clostridia; o__Clostridiales; f__Lachnospiraceae; g__Blautia; s__
23e5edb47f5a9a45adc62dc95d595ce6	1.21835	0.236763	1	1	0.0585337	0.0335331	k__Bacteria; p__Bacteroidetes; c__Bacteroidia; o__Bacteroidales; f__Prevotellaceae; g__Prevotella; s__copri
457d3865cf0a4bc602a07d8d5324388f	-1.20877	0.24975	1	1	8.6253e-05	0.000554073	k__Bacteria; p__Firmicutes; c__Clostridia; o__Clostridiales; f__Lachnospiraceae; g__; s__
686d42b9552375c3b61301ae5605e3a2	1.17223	0.267732	1	1	0.000566805	0.000277036	k__Bacteria; p__Firmicutes; c__Clostridia; o__Clostridiales; f__Lachnospiraceae; g__Roseburia; s__
f9f5f08e8da4cc9740518223846563db	1.18815	0.281718	1	1	0.000566805	0.000187292	k__Bacteria; p__Bacteroidetes; c__Bacteroidia; o__Bacteroidales; f__Rikenellaceae; g__; s__
4c2189b6b5ced3cb80093414e9449de9	1.13503	0.283716	1	1	0.000815707	0.000421408	k__Bacteria; p__Firmicutes; c__Clostridia; o__Clostridiales; f__Ruminococcaceae
59597cd430deea6d8e0908dcd6db7e50	1.09409	0.286713	1	1	0.00864501	0.00319177	k__Bacteria; p__Proteobacteria; c__Betaproteobacteria; o__Burkholderiales; f__Alcaligenaceae; g__Sutterella; s__
cae14798faeabb8e1b8840e712839921	1.24377	0.287712	1	1	0.000537233	0	k__Bacteria; p__Bacteroidetes; c__Bacteroidia; o__Bacteroidales; f__Rikenellaceae; g__Alistipes; s__finegoldii
57e77761c7d4464a3968f059b4a9afcc	1.13144	0.298701	1	1	0.000207007	7.02346e-05	k__Bacteria; p__Firmicutes; c__Clostridia; o__Clostridiales; f__Ruminococcaceae; g__; s__
a650f349bbdffb95b3624519d1ba72b8	-1.04066	0.302697	1	1	0.0016117	0.00302009	k__Bacteria; p__Firmicutes; c__Bacilli; o__Lactobacillales; f__Streptococcaceae; g__Streptococcus; s__
1a389bf765c8ff0f92600f684fbe7ad7	1.10847	0.304695	1	1	0.00441862	0.00138518	k__Bacteria; p__Firmicutes; c__Clostridia; o__Clostridiales; f__Ruminococcaceae; g__Faecalibacterium; s__prausnitzii
92f000f936d3f349c5e7719a5edc5078	1.05384	0.312687	1	1	0.000552019	0.000316056	k__Bacteria; p__Firmicutes; c__Clostridia; o__Clostridiales; f__Lachnospiraceae; g__; s__
217185aee687740c4fa3cc0aa17ee4ff	0.987313	0.320679	1	1	0.0610203	0.0395538	k__Bacteria; p__Firmicutes; c__Erysipelotrichi; o__Erysipelotrichales; f__Erysipelotrichaceae; g__Catenibacterium; s__
6a17479edbe461431433bddb084f731e	1.05118	0.327672	1	1	0.000268616	6.63327e-05	k__Bacteria; p__Proteobacteria; c__Betaproteobacteria; o__Burkholderiales; f__Alcaligenaceae; g__Sutterella; s__
d05c86b5bfc092d8677507fb1eae8d66	1.09696	0.333666	1	1	0.00588738	0.00133446	k__Bacteria; p__Firmicutes; c__Clostridia; o__Clostridiales; f__Ruminococcaceae; g__Ruminococcus; s__
877f27b47c85f6b2d3cf8a6aa86def40	1.10211	0.338661	1	1	0.00404896	0.0018378	k__Bacteria; p__Firmicutes; c__Clostridia; o__Clostridiales; f__Lachnospiraceae; g__; s__
e82ab12c51a893c6d7938a16632199a8	0.98859	0.348651	1	1	0.000559412	0.000245821	k__Bacteria; p__Firmicutes; c__Clostridia; o__Clostridiales; f__Lachnospiraceae
1986030e3c5cd5df6d869054bc96e536	-0.935118	0.350649	1	1	0.0013283	0.00256746	k__Bacteria; p__Proteobacteria; c__Gammaproteobacteria; o__Pasteurellales; f__Pasteurellaceae; g__Haemophilus; s__parainfluenzae
2ae8a432208b85a14e86eb821c86ce2b	0.930384	0.350649	1	1	0.00442108	0.00247772	k__Bacteria; p__Firmicutes; c__Clostridia; o__Clostridiales
48d9883fd871b82d9bbc89cb0447be8c	-1.3658	0.356643	1	1	2.21793e-05	0.000113156	k__Bacteria; p__Firmicutes; c__Clostridia; o__Clostridiales; f__Lachnospiraceae; g__Clostridium; s__aldenense
0681937d15d01090c93f3fb99998d90c	0.984545	0.356643	1	1	0.00387153	0.00218508	k__Bacteria; p__Proteobacteria; c__Deltaproteobacteria; o__Desulfovibrionales; f__Desulfovibrionaceae; g__Desulfovibrio; s__
40a6b537d995aeb12b0100e2cb6ad879	0.940178	0.35964	1	1	0.000128147	7.80384e-05	k__Bacteria; p__Firmicutes; c__Clostridia; o__Clostridiales; f__Lachnospiraceae; g__Blautia; s__
e6a34eb113dba66df0b8bbec907a8f5d	1.09	0.366633	1	1	0.00308786	0.000179488	k__Bacteria; p__Bacteroidetes; c__Bacteroidia; o__Bacteroidales; f__Rikenellaceae; g__Alistipes; s__putredinis
992072d045462445dc239b35300af2cc	-0.943584	0.368631	1	1	0.0670506	0.105524	k__Bacteria; p__Bacteroidetes; c__Bacteroidia; o__Bacteroidales; f__Prevotellaceae; g__Prevotella; s__copri
8a83cfd5eb074b5dbc6118eb03ef915e	0.903822	0.388611	1	1	0.000611164	0.000265331	k__Bacteria; p__Bacteroidetes; c__Bacteroidia; o__Bacteroidales; f__[Odoribacteraceae]; g__Butyricimonas; s__
d315a0b30c8e21db4cfe89e65c0b2bf1	-1.03497	0.38961	1	1	2.21793e-05	7.02346e-05	k__Bacteria; p__Firmicutes; c__Clostridia; o__Clostridiales; f__; g__; s__
0cc2420a6a4698f8bf664d50b17d26b4	1.09551	0.393606	1	1	0.00382717	0.000468231	k__Bacteria; p__Bacteroidetes; c__Bacteroidia; o__Bacteroidales; f__Rikenellaceae; g__Alistipes; s__onderdonkii
69536042153447ceb692aa53159ce0c2	-0.924104	0.394605	1	1	0.000714668	0.00106913	k__Bacteria; p__Firmicutes; c__Clostridia; o__Clostridiales; f__Lachnospiraceae
8ce931b0c99ad5ed648c25483c1ca492	-0.917057	0.401598	1	1	0.000113361	0.000230213	k__Bacteria; p__Firmicutes; c__Erysipelotrichi; o__Erysipelotrichales; f__Erysipelotrichaceae; g__Clostridium; s__ramosum
e5a43b018c81cedd19e9a5354d32d469	1.13045	0.413586	1	1	9.11817e-05	0	k__Bacteria; p__Bacteroidetes; c__Bacteroidia; o__Bacteroidales; f__Bacteroidaceae; g__Bacteroides; s__
588a23811b3e98af68f4f0fb24a0daa8	-0.865316	0.423576	1	1	0.001141	0.00212265	k__Bacteria; p__Firmicutes; c__Clostridia; o__Clostridiales; f__Lachnospiraceae; g__Coprococcus; s__
2b982979f2401a8bc447d7141879e9b2	0.864052	0.425574	1	1	0.00878056	0.00654742	k__Bacteria; p__Firmicutes; c__Clostridia; o__Clostridiales; f__Lachnospiraceae
ad52a0f6646c574417ce0b13b84acfa9	0.897731	0.426573	1	1	0.0105204	0.00451452	k__Bacteria; p__Firmicutes; c__Clostridia; o__Clostridiales; f__Ruminococcaceae; g__Ruminococcus; s__bromii
8937656c16c20701c107e715bad86732	0.830658	0.430569	1	1	0.0189116	0.0126812	k__Bacteria; p__Firmicutes; c__Clostridia; o__Clostridiales; f__Lachnospiraceae; g__Roseburia; s__faecis
46d8ab5615f60d7b522f3590976668be	0.87611	0.436563	1	1	7.63955e-05	2.73134e-05	k__Bacteria; p__Firmicutes; c__Clostridia; o__Clostridiales; f__; g__; s__
b955f67a541a149dd3b179dc62d37a72	0.788008	0.445554	1	1	0.000239044	0.000156077	k__Bacteria; p__Firmicutes; c__Clostridia; o__Clostridiales; f__[Mogibacteriaceae]; g__; s__
60c57911662a9159dfdd0fc05d975a55	0.764729	0.446553	1	1	0.00355609	0.00260258	k__Bacteria; p__Firmicutes; c__Clostridia; o__Clostridiales; f__Ruminococcaceae; g__Gemmiger; s__formicilis
180b74e94caf35fac5e1f0f4b7ad9d9f	0.946777	0.453546	1	1	0.00199861	0.000678934	k__Bacteria; p__Bacteroidetes; c__Bacteroidia; o__Bacteroidales; f__[Odoribacteraceae]; g__Odoribacter; s__
82c890da8759fa9477cd991a1f214b3c	-1.01111	0.454545	1	1	0.000105968	0.000542367	k__Bacteria; p__Firmicutes; c__Clostridia; o__Clostridiales; f__Ruminococcaceae; g__Oscillospira; s__
04195686f2b70585790ec75320de0d6f	0.950799	0.458541	1	1	0.00523432	0.00136177	k__Bacteria; p__Proteobacteria; c__Gammaproteobacteria; o__Enterobacteriales; f__Enterobacteriaceae
010f0ac2691bc0be12d0633d4b5d2cc4	0.750676	0.462537	1	1	0.00487946	0.00306691	k__Bacteria; p__Firmicutes; c__Clostridia; o__Clostridiales; f__Ruminococcaceae; g__Faecalibacterium; s__prausnitzii
ca9dec36ad0aa5a1473144ddcb74951d	0.921542	0.462537	1	1	0.00517764	0.0020407	k__Bacteria; p__Firmicutes; c__Clostridia; o__Clostridiales; f__Ruminococcaceae
904ad13c7b8512200836d5cd9fb09e1b	1.06273	0.464535	1	1	0.00013554	3.90192e-06	k__Bacteria; p__Bacteroidetes; c__Bacteroidia; o__Bacteroidales; f__Rikenellaceae; g__Alistipes; s__indistinctus
0b05a2e48cdc5f9e766bb0f4c209d4b4	0.880136	0.487512	1	1	9.11817e-05	3.12154e-05	k__Bacteria; p__Firmicutes; c__Clostridia; o__Clostridiales; f__Ruminococcaceae; g__Oscillospira; s__
3d766867c97f511431bf97e059d6498f	-0.809235	0.494505	1	1	0.00723293	0.0137192	k__Bacteria; p__Bacteroidetes; c__Bacteroidia; o__Bacteroidales; f__Porphyromonadaceae; g__Parabacteroides; s__
96b08b31f324f113c7b260a50f09860c	-0.975661	0.495504	1	1	0.000263688	0.00103401	k__Bacteria; p__Bacteroidetes; c__Bacteroidia; o__Bacteroidales; f__[Odoribacteraceae]; g__Butyricimonas; s__
32a21601ca89d1f2629c1a9fc2de4359	0.906038	0.502498	1	1	0.000263688	8.19403e-05	k__Bacteria; p__Bacteroidetes; c__Bacteroidia; o__Bacteroidales; f__[Paraprevotellaceae]; g__Paraprevotella; s__
ea3433f2c148c6fae4cc2e9ae197f5b8	-0.706261	0.506494	1	1	0.00990431	0.0188502	k__Bacteria; p__Firmicutes; c__Clostridia; o__Clostridiales; f__Peptostreptococcaceae
4be97abf1ab678a8322783fab899c3a4	1.14921	0.512488	1	1	1.9715e-05	0	k__Bacteria; p__Firmicutes; c__Clostridia; o__Clostridiales; f__Ruminococcaceae; g__Anaerofilum; s__
1aab913302590e21a7be28b1494a3320	-0.81396	0.512488	1	1	2.21793e-05	5.0725e-05	k__Bacteria; p__Firmicutes; c__Clostridia; o__Clostridiales; f__Ruminococcaceae; g__Oscillospira; s__
bad4f7c5ada34a1f813946abcfe5c556	0.662226	0.519481	1	1	0.00141948	0.00104962	k__Bacteria; p__Firmicutes; c__Clostridia; o__Clostridiales; f__; g__; s__
0f92fcc184a951ff8b0914467ad2f8f9	0.908243	0.528472	1	1	0.000904424	0.000187292	k__Bacteria; p__Proteobacteria; c__Deltaproteobacteria; o__Desulfovibrionales; f__Desulfovibrionaceae; g__Bilophila; s__
1ad289cd8f44e109fd95de0382c5b252	-0.518108	0.545455	1	1	3.20368e-05	5.85288e-05	k__Bacteria; p__Firmicutes; c__Clostridia; o__Clostridiales; f__Lachnospiraceae; g__Clostridium; s__hathewayi
3f1ed51e954b35a8108c12dd882b696b	0.656604	0.545455	1	1	0.000485481	0.000296546	k__Bacteria; p__Firmicutes; c__Clostridia; o__Clostridiales; f__Ruminococcaceae; g__Oscillospira; s__
a167e4d4418792dcaba877443ed0e66d	-0.652371	0.552448	1	1	0.000160184	0.000312154	k__Bacteria; p__Bacteroidetes; c__Bacteroidia; o__Bacteroidales; f__[Odoribacteraceae]; g__Butyricimonas; s__
2403a466dd6d1e4f551d80394c2aa994	-0.617919	0.555445	1	1	0.000924139	0.00150614	k__Bacteria; p__Bacteroidetes; c__Bacteroidia; o__Bacteroidales; f__[Paraprevotellaceae]; g__Paraprevotella; s__
3128e057b1d4f320961e4da677724613	-0.802119	0.558442	1	1	1.9715e-05	5.46269e-05	k__Bacteria; p__Firmicutes; c__Clostridia; o__Clostridiales; f__Lachnospiraceae; g__Clostridium; s__symbiosum
32382a0f5831da5faee464d011b5616c	-0.916184	0.57043	1	1	0.00170288	0.00521687	k__Bacteria; p__Firmicutes; c__Clostridia; o__Clostridiales; f__Lachnospiraceae; g__Lachnobacterium; s__
25def15fb42bed6855ede4893d27a21d	0.82328	0.575425	1	1	0.0170781	0.000109254	k__Bacteria; p__Verrucomicrobia; c__Verrucomicrobiae; o__Verrucomicrobiales; f__Verrucomicrobiaceae; g__Akkermansia; s__muciniphila
b0645cbec7653c887cb868a248d95874	-0.572539	0.585415	1	1	0.0134259	0.0161618	k__Bacteria; p__Firmicutes; c__Clostridia; o__Clostridiales; f__Ruminococcaceae; g__Faecalibacterium; s__prausnitzii
436497b0e3edb384200f5b9b82883182	0.735311	0.586414	1	1	6.40737e-05	1.95096e-05	k__Bacteria; p__Firmicutes; c__Clostridia; o__Clostridiales; f__Ruminococcaceae; g__; s__
f10155af1849a17996f302d71b32398c	0.859011	0.588412	1	1	0.000739311	0.000144371	k__Bacteria; p__Firmicutes; c__Clostridia; o__Clostridiales; f__Lachnospiraceae
77ad88eed91eef009bf64f101c96baa6	-0.516634	0.593407	1	1	0.00169795	0.00238798	k__Bacteria; p__Firmicutes; c__Clostridia; o__Clostridiales; f__Lachnospiraceae; g__Roseburia; s__
10155b2834300619ce0102110a37b057	-0.638112	0.597403	1	1	0.000342548	0.000522857	k__Bacteria; p__Firmicutes; c__Clostridia; o__Clostridiales; f__Lachnospiraceae; g__; s__
9f74473636e6874853d88dfcbcecff49	0.616805	0.599401	1	1	5.66805e-05	3.12154e-05	k__Bacteria; p__Firmicutes; c__Bacilli; o__Lactobacillales; f__Streptococcaceae; g__Lactococcus; s__
bfb7bb16ab570748b3a5d099e9426af1	-0.65026	0.613387	1	1	7.39311e-05	0.000140469	k__Bacteria; p__Firmicutes; c__Clostridia; o__Clostridiales; f__Ruminococcaceae; g__; s__
74923f4bbde849e27fc4eda25d757e2a	-0.628381	0.631369	1	1	0.000105968	0.000210704	k__Bacteria; p__Firmicutes; c__Erysipelotrichi; o__Erysipelotrichales; f__Erysipelotrichaceae; g__[Eubacterium]; s__dolichum
fea3411c847e6627afb5e78b88e2e9af	-0.47293	0.64036	1	1	0.000988213	0.00163491	k__Bacteria; p__Firmicutes; c__Clostridia; o__Clostridiales; f__Lachnospiraceae; g__[Ruminococcus]; s__torques
6a129e8ae637c96e7bb56223913911f7	0.521027	0.645355	1	1	0.000443587	0.000292644	k__Bacteria; p__Firmicutes; c__Clostridia; o__Clostridiales; f__Lachnospiraceae; g__Coprococcus; s__
8f1c11c7b732265cbfc1bb7dbd0241e7	0.487129	0.651349	1	1	0.000968498	0.000756973	k__Bacteria; p__Firmicutes; c__Clostridia; o__Clostridiales; f__Lachnospiraceae; g__; s__
d39f37b814ebd81091a949f8bd9d1710	-0.471386	0.654346	1	1	0.000460837	0.000702346	k__Bacteria; p__Bacteroidetes; c__Bacteroidia; o__Bacteroidales; f__Bacteroidaceae; g__Bacteroides; s__caccae
251429848560a80abcb96640ceb102db	0.466444	0.658342	1	1	0.000946319	0.000643817	k__Bacteria; p__Firmicutes; c__Clostridia; o__Clostridiales; f__Lachnospiraceae; g__; s__
7b2ff5940de11da4dc3bb208805dff11	-0.548387	0.684316	1	1	1.72506e-05	3.12154e-05	k__Bacteria; p__Firmicutes; c__Clostridia; o__Clostridiales; f__Ruminococcaceae; g__Oscillospira; s__
7ce470a3f833253f6d667fa6830abe07	-0.438452	0.685315	1	1	5.42162e-05	7.80384e-05	k__Bacteria; p__Firmicutes; c__Clostridia; o__Clostridiales; f__Lachnospiraceae; g__[Ruminococcus]; s__
de6891b6f7a1f35bd9ccbc058b9e1a77	-0.390948	0.688312	1	1	0.000147862	0.00018339	k__Bacteria; p__Firmicutes; c__Clostridia; o__Clostridiales; f__Lachnospiraceae
059c8f8bb468064b134ea6d3661761ea	-0.658142	0.695305	1	1	0.00133076	0.00228653	k__Bacteria; p__Firmicutes; c__Clostridia; o__Clostridiales; f__Lachnospiraceae; g__Lachnospira; s__
f45b62ab6ec22fb20364a7e05088158f	0.382382	0.703297	1	1	0.00027601	0.000214606	k__Bacteria; p__Firmicutes; c__Clostridia; o__Clostridiales; f__Lachnospiraceae
3233034b11dfc584717d9264882a4fce	-0.460399	0.709291	1	1	3.45012e-05	4.68231e-05	k__Bacteria; p__Firmicutes; c__Clostridia; o__Clostridiales; f__Ruminococcaceae
d061a99148d649c4eca4836c5f4b5b68	0.789867	0.714286	1	1	0.00594653	0.000905246	k__Bacteria; p__Firmicutes; c__Erysipelotrichi; o__Erysipelotrichales; f__Erysipelotrichaceae; g__; s__
8a261f382a739bbc5f9494b2c64c2744	-0.363179	0.721279	1	1	0.00242987	0.00295375	k__Bacteria; p__Firmicutes; c__Clostridia; o__Clostridiales; f__Lachnospiraceae; g__Coprococcus; s__
f596fa835cdfdb22d6494b012f61fff2	0.405213	0.724276	1	1	0.00111882	0.000909148	k__Bacteria; p__Firmicutes; c__Clostridia; o__Clostridiales; f__Lachnospiraceae; g__Blautia; s__
8720f9ecd2331ce68e2896df1bf2d977	-0.377085	0.726274	1	1	0.002075	0.00252845	k__Bacteria; p__Actinobacteria; c__Coriobacteriia; o__Coriobacteriales; f__Coriobacteriaceae; g__Collinsella; s__aerofaciens
2fad39e365933a7f925040cb3c2a5ef8	0.37197	0.74026	1	1	0.000357334	0.000300448	k__Bacteria; p__Actinobacteria; c__Coriobacteriia; o__Coriobacteriales; f__Coriobacteriaceae; g__; s__
ba88d4e4e6a24ecc2a5aab6bdfbb77f5	0.280885	0.75025	1	1	0.000428801	0.000374584	k__Bacteria; p__Firmicutes; c__Clostridia; o__Clostridiales; f__Ruminococcaceae; g__Oscillospira; s__
2ab8310e1e510f8045c7f4d191fa36be	0.649098	0.754246	1	1	0.000800921	0.000429211	k__Bacteria; p__Firmicutes; c__Clostridia; o__Clostridiales; f__Lachnospiraceae; g__; s__
c162a4f3943238810eba8a25f0563cca	0.682115	0.758242	1	1	0.0107077	0.00483058	k__Bacteria; p__Bacteroidetes; c__Bacteroidia; o__Bacteroidales; f__Bacteroidaceae; g__Bacteroides
0189d0173c07f11e7586ff20eb33f5ba	-0.531579	0.759241	1	1	9.85749e-06	1.95096e-05	k__Bacteria; p__Firmicutes; c__Erysipelotrichi; o__Erysipelotrichales; f__Erysipelotrichaceae; g__; s__
90c2b51afe404951ec89bd52c7ae1f58	-0.459424	0.759241	1	1	1.23219e-05	2.34115e-05	k__Bacteria; p__Firmicutes; c__Clostridia; o__Clostridiales; f__Lachnospiraceae; g__Dorea; s__
539ca948741b9a713eb781d4281b23fc	0.629803	0.759241	1	1	0.00011829	5.0725e-05	k__Bacteria; p__Firmicutes; c__Clostridia; o__Clostridiales; f__Ruminococcaceae; g__Anaerotruncus; s__
30207d209491dfb7de83344e77fd6fbd	0.422286	0.761239	1	1	0.00377049	0.00268842	k__Bacteria; p__Firmicutes; c__Clostridia; o__Clostridiales; f__; g__; s__
72d6ddeb60679dd2e2844fe039e1a760	-0.300435	0.762238	1	1	0.000241508	0.000312154	k__Bacteria; p__Proteobacteria; c__Deltaproteobacteria; o__Desulfovibrionales; f__Desulfovibrionaceae; g__; s__
ada85ea79666bce780693d3893d349cd	0.324462	0.765235	1	1	0.000189757	0.000152175	k__Bacteria; p__Firmicutes; c__Clostridia; o__Clostridiales; f__Ruminococcaceae; g__; s__
79280cea51a6fe8a3432b2f266dd34db	-0.292365	0.772228	1	1	0.019885	0.0219327	k__Bacteria; p__Firmicutes; c__Clostridia; o__Clostridiales; f__Ruminococcaceae; g__Faecalibacterium; s__prausnitzii
fdb1c35a8dab336d65ed22d796e71e4b	0.238725	0.774226	1	1	0.000125683	0.000109254	k__Bacteria; p__Actinobacteria; c__Coriobacteriia; o__Coriobacteriales; f__Coriobacteriaceae; g__; s__
0f6200a5b77099113b52eea9a8645181	0.333674	0.779221	1	1	0.0163141	0.0140742	k__Bacteria; p__Firmicutes; c__Erysipelotrichi; o__Erysipelotrichales; f__Erysipelotrichaceae; g__[Eubacterium]; s__biforme
9dc78fd8f2f7cb10e190e77af61c7ecd	-0.271065	0.802198	1	1	0.000120754	0.000140469	k__Bacteria; p__Firmicutes; c__Clostridia; o__Clostridiales; f__Lachnospiraceae
3e93fd55a231bb99b67a666bad8446a8	-0.38007	0.805195	1	1	0.000162649	0.000238017	k__Bacteria; p__Firmicutes; c__Clostridia; o__Clostridiales; f__Ruminococcaceae; g__Ruminococcus; s__
340a5698fe78713b785c3bcce89df73b	0.55096	0.806194	1	1	0.00170042	0.000858423	k__Bacteria; p__Bacteroidetes; c__Bacteroidia; o__Bacteroidales; f__Rikenellaceae; g__; s__
7201d53bd647437ec3de879774eba498	0.349196	0.813187	1	1	0.000150327	0.00012096	k__Bacteria; p__Actinobacteria; c__Coriobacteriia; o__Coriobacteriales; f__Coriobacteriaceae; g__Slackia; s__
7e17a5137fd9dab8c02617a186088c4d	0.31248	0.826174	1	1	8.87174e-05	6.24307e-05	k__Bacteria; p__Firmicutes; c__Clostridia; o__Clostridiales; f__Ruminococcaceae; g__; s__
1527fd8b14037f53b8edb26b111e1f72	0.220294	0.833167	1	1	0.00138005	0.00123691	k__Bacteria; p__Firmicutes; c__Clostridia; o__Clostridiales; f__Lachnospiraceae; g__; s__
a3607a88a8ed64e24a374847b23e404f	-0.228021	0.836164	1	1	0.00275763	0.00342979	k__Bacteria; p__Firmicutes; c__Clostridia; o__Clostridiales; f__Ruminococcaceae; g__Ruminococcus; s__
1e6fb78e2244ca940f9fc31d88d711dc	0.218956	0.839161	1	1	0.00158213	0.00135787	k__Bacteria; p__Firmicutes; c__Clostridia; o__Clostridiales; f__[Mogibacteriaceae]; g__Mogibacterium; s__
9f4d14b114e7499772a797790d81c1db	0.232384	0.841159	1	1	0.00129872	0.00113936	k__Bacteria; p__Firmicutes; c__Clostridia; o__Clostridiales; f__Lachnospiraceae; g__Coprococcus; s__catus
c4f9ef34bd2919511069f409c25de6f1	0.337543	0.848152	1	1	0.00483017	0.00278987	k__Bacteria; p__Bacteroidetes; c__Bacteroidia; o__Bacteroidales; f__Bacteroidaceae; g__Bacteroides; s__
959d48a11e3b26c9268f0bd1dae6ec40	-0.200192	0.848152	1	1	0.00289564	0.00316446	k__Bacteria; p__Firmicutes; c__Clostridia; o__Clostridiales; f__Lachnospiraceae; g__Blautia; s__obeum
03569e3fd843f501355f7853b0ec9361	-0.209869	0.853147	1	1	0.00062595	0.000753071	k__Bacteria; p__Proteobacteria; c__Betaproteobacteria; o__Burkholderiales; f__Alcaligenaceae; g__Sutterella; s__
04c8be5a3a6ba2d70446812e99318905	0.499218	0.857143	1	1	0.00248162	0.00147493	k__Bacteria; p__Bacteroidetes; c__Bacteroidia; o__Bacteroidales; f__Bacteroidaceae; g__Bacteroides
a678fc12f8ade13c2f9c76d3d5c1cea0	-0.205365	0.859141	1	1	0.0054709	0.0060987	k__Bacteria; p__Firmicutes; c__Clostridia; o__Clostridiales; f__Veillonellaceae; g__Phascolarctobacterium; s__
c82032c40c98975f71892e4be561c87a	0.442587	0.859141	1	1	0.000421408	0.00028484	k__Bacteria; p__Firmicutes; c__Clostridia; o__Clostridiales; f__Ruminococcaceae; g__Oscillospira; s__
59196a586276f0be745d0e334fc071c6	0.173539	0.863137	1	1	0.00430279	0.00404629	k__Bacteria; p__Firmicutes; c__Clostridia; o__Clostridiales; f__Lachnospiraceae; g__Blautia; s__
1ef782a559e3e0a4ab42516e0a2c828f	-0.368099	0.865135	1	1	0.000115825	0.00018339	k__Bacteria; p__Firmicutes; c__Clostridia; o__Clostridiales; f__Lachnospiraceae; g__; s__
41239266f2952a56a313fc4798f28a1c	-0.196046	0.871129	1	1	0.000815707	0.000944265	k__Bacteria; p__Firmicutes; c__Clostridia; o__Clostridiales; f__; g__; s__
e2c3ff4f647112723741aa72087f1bfa	0.177284	0.879121	1	1	0.00499528	0.00413604	k__Bacteria; p__Actinobacteria; c__Actinobacteria; o__Bifidobacteriales; f__Bifidobacteriaceae; g__Bifidobacterium
138daeaeee1211d2a3d8502b8fe23b2a	-0.171086	0.879121	1	1	0.0055128	0.00593872	k__Bacteria; p__Bacteroidetes; c__Bacteroidia; o__Bacteroidales; f__S24-7; g__; s__
c942f59feffce9c3ab527135de234101	0.128623	0.881119	1	1	0.00528608	0.00499446	k__Bacteria; p__Firmicutes; c__Clostridia; o__Clostridiales; f__Lachnospiraceae; g__Roseburia; s__inulinivorans
4c731267e801c2afe253b5cbb58bdd24	-0.148407	0.885115	1	1	0.00405636	0.00427651	k__Bacteria; p__Firmicutes; c__Clostridia; o__Clostridiales; f__Lachnospiraceae; g__Dorea; s__
0c70bdd5631104dd3d818561c9166f6c	0.419931	0.888112	1	1	5.91449e-05	3.12154e-05	k__Bacteria; p__Firmicutes; c__Clostridia; o__Clostridiales; f__Lachnospiraceae; g__Clostridium; s__lavalense
f12011ad5219b22b6ca790103333a755	0.360076	0.901099	1	1	5.17518e-05	3.12154e-05	k__Bacteria; p__Firmicutes; c__Clostridia; o__Clostridiales; f__Ruminococcaceae; g__Oscillospira; s__
51a63d18809e04591820c7e3f3acf0b4	0.5278	0.906094	1	1	3.20368e-05	1.17058e-05	k__Bacteria; p__Firmicutes; c__Clostridia; o__Clostridiales; f__Ruminococcaceae; g__; s__
6c7fa77831ae630967a6fbfc8ee47901	0.125145	0.906094	1	1	0.00556455	0.00533002	k__Bacteria; p__Firmicutes; c__Clostridia; o__Clostridiales; f__Lachnospiraceae; g__Clostridium; s__clostridioforme
3f55a8ca784ae7190790023a30cd859c	-0.184154	0.919081	1	1	8.37886e-05	0.00010145	k__Bacteria; p__Bacteroidetes; c__Bacteroidia; o__Bacteroidales; f__Porphyromonadaceae; g__Parabacteroides; s__gordonii
4311a44a7d56ce4086afad3e75bedd6e	0.380354	0.919081	1	1	0.000581592	0.000390192	k__Bacteria; p__Firmicutes; c__Clostridia; o__Clostridiales; f__Ruminococcaceae
a24dae6b87885a55d81df1ea6d1abaf5	0.129319	0.921079	1	1	0.000961105	0.000866227	k__Bacteria; p__Firmicutes; c__Clostridia; o__Clostridiales; f__Lachnospiraceae; g__; s__
2319f9fecaef59a51537cdcb69cf5615	0.140064	0.926074	1	1	6.16093e-05	5.46269e-05	k__Bacteria; p__Firmicutes; c__Clostridia; o__Clostridiales; f__Ruminococcaceae
363c1c39d58bce4fc3218659d0944258	0.109323	0.928072	1	1	0.00139237	0.00128373	k__Bacteria; p__Firmicutes; c__Clostridia; o__Clostridiales; f__Lachnospiraceae
89aabf43d24dd5bd0fd0f5aca189d341	0.086426	0.934066	1	1	0.00283896	0.00273915	k__Bacteria; p__Firmicutes; c__Clostridia; o__Clostridiales; f__Lachnospiraceae; g__Dorea; s__formicigenerans
5860dac317300b1fe6094e958240cc7f	-0.122446	0.937063	1	1	0.000280938	0.000296546	k__Bacteria; p__Firmicutes; c__Clostridia; o__Clostridiales; f__Lachnospiraceae; g__Coprococcus; s__
6bbaf2d026d54c61f24b5c5483e56842	0.0597342	0.939061	1	1	0.00149834	0.00140859	k__Bacteria; p__Bacteroidetes; c__Bacteroidia; o__Bacteroidales; f__Porphyromonadaceae; g__Parabacteroides; s__distasonis
3b092a59cd0e2d57483420cc994ec49c	0.0785919	0.952048	1	1	0.0015772	0.00144761	k__Bacteria; p__Firmicutes; c__Clostridia; o__Clostridiales; f__Clostridiaceae; g__Clostridium; s__celatum
0d3b942348cade7e1c41ac52df03e63e	0.0933966	0.957043	1	1	0.000793528	0.000733561	k__Bacteria; p__Firmicutes; c__Clostridia; o__Clostridiales; f__Veillonellaceae; g__Dialister; s__
447b9d6a5c17543a456c597e65b37139	0.0629664	0.959041	1	1	0.00420422	0.00410872	k__Bacteria; p__Firmicutes; c__Clostridia; o__Clostridiales; f__Lachnospiraceae; g__Coprococcus; s__
8a9f7499cdb85b8efa497bb56256cb43	0.0597563	0.968032	1	1	0.000480552	0.000460427	k__Bacteria; p__Firmicutes; c__Clostridia; o__Clostridiales; f__Lachnospiraceae
7c82a2ef7685c5c6dc3080f56033cee9	-0.0788568	0.97003	1	1	8.13243e-05	8.58423e-05	k__Bacteria; p__Proteobacteria; c__Betaproteobacteria; o__Burkholderiales; f__Oxalobacteraceae; g__Oxalobacter; s__formigenes
a6099802840e60febef8e896967b7747	0.0470305	0.974026	1	1	0.000532304	0.000518956	k__Bacteria; p__Firmicutes; c__Clostridia; o__Clostridiales; f__[Mogibacteriaceae]; g__; s__
d6bb5703483ac68992e09ce17683c52f	0.789719	0.974026	1	1	4.92874e-06	0	k__Bacteria; p__Firmicutes; c__Clostridia; o__Clostridiales; f__Ruminococcaceae; g__; s__
b153e0852342c0738da791930625716f	-0.019817	0.98002	1	1	0.00624225	0.00631721	k__Bacteria; p__Firmicutes; c__Erysipelotrichi; o__Erysipelotrichales; f__Erysipelotrichaceae; g__[Eubacterium]; s__biforme
7ebc04cb539befd9f2e7faa131628c66	0.0240564	0.98002	1	1	0.000522447	0.000515054	k__Bacteria; p__Firmicutes; c__Clostridia; o__Clostridiales; f__[Mogibacteriaceae]; g__; s__
c5b4c6b372dbc13b6a7f2d466fc7335f	0.789719	0.982018	1	1	3.94299e-05	0	k__Bacteria; p__Firmicutes; c__Clostridia; o__Clostridiales; f__Lachnospiraceae
ea2b0e4a93c24c6c3661cbe347f93b74	0.010798	0.993007	1	1	0.00432497	0.00429211	k__Bacteria; p__Bacteroidetes; c__Bacteroidia; o__Bacteroidales; f__Bacteroidaceae; g__Bacteroides; s__uniformis
2a99ec1157a90661db7ff643b82f1914	0.322339	0.996004	1	1	0.00681399	0.0040697	k__Bacteria; p__Bacteroidetes; c__Bacteroidia; o__Bacteroidales; f__Bacteroidaceae; g__Bacteroides; s__fragilis
10cd502b01abafc87e2ecbad86389286	0.00616702	0.998002	1	1	0.00229187	0.00228653	k__Bacteria; p__Firmicutes; c__Clostridia; o__Clostridiales; f__Lachnospiraceae; g__; s__
993ea35e8ad7ff6894e32247dc507e9b	0.789719	1	1	1	1.47862e-05	0	k__Bacteria; p__Firmicutes; c__Clostridia; o__Clostridiales; f__Lachnospiraceae; g__Blautia; s__producta
61795ee8e60f4a0f66080ab812573fb8	-0.145187	1	1	1	2.21793e-05	2.73134e-05	k__Bacteria; p__Firmicutes; c__Clostridia; o__Clostridiales; f__Lachnospiraceae
f738d6eb5441459c12e96023d56dafcf	nan	nan	1	nan	0	0	k__Bacteria; p__Firmicutes; c__Clostridia; o__Clostridiales; f__Lachnospiraceae; g__Coprococcus; s__
b2ab597a902ff227a5ba76030cd6002e	nan	nan	1	nan	0	0	k__Bacteria; p__Firmicutes; c__Clostridia; o__Clostridiales; f__Ruminococcaceae
113ce005a880987438bdbe19ee22add8	nan	nan	1	nan	0	0	k__Bacteria; p__Firmicutes; c__Bacilli; o__Turicibacterales; f__Turicibacteraceae; g__Turicibacter; s__
